1 **Effects of Hydroxychloroquine and Azithromycin on iPSC-derived**  
2 **Cardiomyocytes: Considerations for the Treatment of COVID-19**  
3 **Patients**

4

5 Wener Li<sup>a,§</sup>, Xiaojing Luo<sup>a,§</sup>, Mareike S. Poetsch<sup>a</sup>, Reinhard Oertel<sup>b</sup>, Kapil Nichani<sup>c</sup>, Martin  
6 Schneider<sup>c</sup>, Anna Strano<sup>a</sup>, Marcel Hasse<sup>a</sup>, Robert-Patrick Steiner<sup>a</sup>, Lukas Cyganek<sup>d,e</sup>, Karina  
7 Hettwer<sup>c</sup>, Steffen Uhlig<sup>c</sup>, Kirsten Simon<sup>c</sup>, Kaomei Guan<sup>a,\*</sup>, Mario Schubert<sup>a,\*</sup>

8 <sup>a</sup> Institute of Pharmacology and Toxicology, Technische Universität Dresden, Germany

9 <sup>b</sup> Institute of Clinical Pharmacology, Technische Universität Dresden, Germany

10 <sup>c</sup> QuoData – Quality & Statistics GmbH, Dresden, Germany

11 <sup>d</sup> Clinic for Cardiology and Pneumology, University Medical Center Göttingen, Germany

12 <sup>e</sup> DZHK (German Center for Cardiovascular Research), partner site Göttingen, Germany

13

14 <sup>§</sup> These authors contributed equally to this work.

15 \* MSchu and KG share senior authorship.

16

17 \* Corresponding author:

18 Prof. Dr. Kaomei Guan

19 Institute of Pharmacology and Toxicology

20 Technische Universität Dresden

21 Fetscherstraße 74

22 01307 Dresden, Germany

23 Tel: (+49)3514586246

24 Fax: (+49)3514586315

25 E-mail: kaomei.guan@tu-dresden.de

26

27 **Abstract**

28 Despite known adverse effects of hydroxychloroquine (HCQ) and azithromycin (AZM) on cardiac  
29 function, HCQ and AZM have been used as combination therapy in the treatment of COVID-19  
30 patients. Recent clinical data indicate higher complication rates with HCQ/AZM combination  
31 treatment in comparison to monotherapy. Here, we used human induced pluripotent stem cell-  
32 derived cardiomyocytes (iPSC-CMs) to systematically investigate the effects of HCQ and AZM  
33 individually and in combination. The clinically observed QT prolongation caused by treatment with  
34 HCQ could be recapitulated in iPSC-CMs based on prolonged field potential duration (FPDc).  
35 Interestingly, HCQ-induced FPDc prolongation was strongly enhanced by combined treatment with  
36 AZM, although AZM alone slightly shortened FPDc in iPSC-CMs. Furthermore, combined  
37 treatment with AZM and HCQ leads to higher cardiotoxicity, more severe structural disarrangement,  
38 and more pronounced contractile and electrophysiological dysfunctions, compared to respective  
39 mono-treatments. First mechanistic insights underlying the synergistic effects of AZM and HCQ on  
40 iPSC-CM functionality are provided based on increased Cx43- and Nav1.5-protein levels. Taken  
41 together, our results highlight that combined treatment with HCQ and AZM strongly enhances the  
42 adverse effects on cardiomyocytes, providing mechanistic evidence for the high mortality in  
43 patients receiving HCQ/AZM combination treatment.

44

45

46

47

48 **Keywords:** COVID-19; hydroxychloroquine; azithromycin; field potential duration; conduction  
49 velocity; human induced pluripotent stem cells; cardiomyocyte; drug testing

## 50 Introduction

51 The severe acute respiratory syndrome coronavirus 2 (SARS-CoV-2) has caused a worldwide  
52 pandemic. Several anti-viral drugs have been considered to improve clinical outcomes, including  
53 hydroxychloroquine (HCQ), remdesivir, and lopinavir<sup>1</sup>. Attempts using HCQ in combination with  
54 azithromycin (AZM) reported first positive results for the treatment of SARS-CoV-2 infected  
55 (COVID-19) patients, demonstrating reinforced viral load reduction/disappearance in a small  
56 number of COVID-19 patients<sup>2, 3</sup>. However, this study has been frequently criticized, because  
57 following clinical trials and the meta-analyses could not confirm the efficacy of treatment with HCQ  
58 or HCQ in combination with AZM<sup>1, 4, 5</sup>. Moreover, side effects on cardiovascular function have been  
59 widely observed during long-term HCQ/AZM combination therapy<sup>6, 7</sup>.

60 Chloroquine (CQ) and HCQ are widely used antimalarial medications and known to inhibit the  
61 replication of viruses *in vitro*<sup>8</sup>. Conduction disorders were reported to occur in 85% of patients after  
62 chronic treatment with HCQ (or CQ) and represent one of the main side effects of HCQ<sup>9, 10</sup>.  
63 Mechanistic insights from animal models revealed that acute application of HCQ reduces the heart  
64 rate by modulating the funny current  $I_f$ <sup>11, 12</sup>.

65 AZM, a broad-spectrum macrolide antibiotic, was considered a good safety profile until the report  
66 of a small absolute increase in cardiovascular deaths during 5 days of AZM therapy<sup>13</sup>. In addition,  
67 several cases of AZM-induced QT-interval prolongation were reported in the clinic<sup>12, 14</sup>.

68 A retrospective multicenter study by Rosenberg *et al.* confirmed that the combination therapy of  
69 HCQ and AZM not only potentiated the risk for cardiac arrest, but is further associated with an  
70 increased mortality rate<sup>15</sup>. In line with these findings, Wang *et al.* showed that the treatment with  
71 combined HCQ and AZM, but not HCQ or AZM alone, enhanced the susceptibility for ventricular  
72 arrhythmias<sup>16</sup>. QT interval prolongation, as reported by various groups<sup>17, 18, 19, 20</sup>, must be  
73 considered as an additional adverse effect for COVID-19 patients resulting from the HCQ and AZM  
74 combination therapy. As the mechanisms underlying HCQ and AZM-related cardiac synergistic  
75 effects are not fully understood, the benefit-risk balance between the treatment of COVID-19  
76 patients with such compounds and potential cardiac side effects remains a dilemma for physicians.

77 The aim of the study was to investigate the effects of HCQ, AZM, and their combination, in a  
78 clinically relevant concentration range and treatment duration, to better understand their  
79 arrhythmia-inducing mechanisms in an *in vitro* human cardiomyocyte model system. The use of  
80 induced pluripotent stem cell-derived cardiomyocytes (iPSC-CMs) in this study offered a robust  
81 platform to investigate the consequences of HCQ and AZM treatment on the viability, the  
82 contractile structure, and on contractility and electrophysiology of human cardiomyocytes.

83

## 84 **Results**

85 This study was designed to characterize the effects of HCQ and AZM alone or in combination on  
86 iPSC-CMs and to investigate the underlying mechanistic basis for the increased complication rates  
87 with combination therapy. The concentrations were chosen based on previously reported plasma  
88 concentrations of the drugs in patients. In the treatment of COVID-19, the drugs were  
89 administrated to patients for 5-10 days. Thus, in this study, iPSC-CMs from 4 different donors (1-2  
90 iPSC lines each) without known cardiovascular disease were treated with HCQ (1, 3, and 10  $\mu$ M),  
91 AZM (1 and 10  $\mu$ M) or their combination for 7 days (Supplementary Figure 1). Afterward, they were  
92 cultured for another 7 days without the drugs (washout period).

93

### 94 *Effects of HCQ and AZM on cell morphology and viability*

95 First, the effects of HCQ and AZM on the morphology of iPSC-CMs were investigated. Treatments  
96 with AZM and HCQ, in particular at higher concentrations, caused the formation of vesicle-like  
97 structures within the cells (Figure 1A), which persisted till 7 days after drug washout (Figure 1D).  
98 Overview images (Figure 1A) and cell nucleus counting (Supplementary Figure 2) showed  
99 reduction in total cell number after 7 days of the combination treatment with 10  $\mu$ M HCQ and  
100 10  $\mu$ M AZM. Importantly, treatment with vehicle had no influence on viability or cell number  
101 (Supplementary Figure 3A-C). Cells treated with 10  $\mu$ M HCQ alone or in combination with 1  $\mu$ M  
102 AZM showed a progressive cell death (Figure 1D). The MTT assay revealed that 7-day  
103 combination treatment with 10  $\mu$ M HCQ and 10  $\mu$ M AZM led to less than 50% of cells at a viable  
104 and metabolically active state (Figure 1B), whereas HCQ (1  $\mu$ M or 3  $\mu$ M) alone or in combination  
105 with AZM (1  $\mu$ M or 10  $\mu$ M), respectively, did not significantly affect metabolic activity of iPSC-CMs  
106 (Figure 1B). Significantly higher rates of cell death were also observed as indicated by increased  
107 lactate dehydrogenase (LDH) activity in the cell supernatant in the groups treated with 10  $\mu$ M HCQ  
108 in combination with AZM (1  $\mu$ M or 10  $\mu$ M) (Figure 1C). In contrast to HCQ, 10  $\mu$ M AZM alone  
109 showed no effect on cell viability using both MTT and LDH activity assays (Figure 1B, C). After 7-  
110 day drug washout, the cytotoxic effect of 10  $\mu$ M HCQ became more evident. The MTT assay  
111 revealed a further decrease in viability of cells treated with 10  $\mu$ M HCQ alone or in combination  
112 with 1  $\mu$ M AZM, which was consistent with reduced cell confluency (Figure 1D, E). Notably, due to  
113 significantly reduced cell numbers in groups treated with 10  $\mu$ M HCQ alone or in combination with  
114 AZM as well as the daily medium change, LDH activity in the supernatant is not representative in  
115 these samples after the drug washout (Figure 1F). Treatment of cells with lower drug  
116 concentrations (1 or 3  $\mu$ M HCQ, 1 or 10  $\mu$ M AZM) did not affect cell viability (Figure 1E and F).  
117 These results demonstrate the high toxicity of HCQ at higher concentrations, which is further  
118 increased in the presence of AZM.



Figure 1

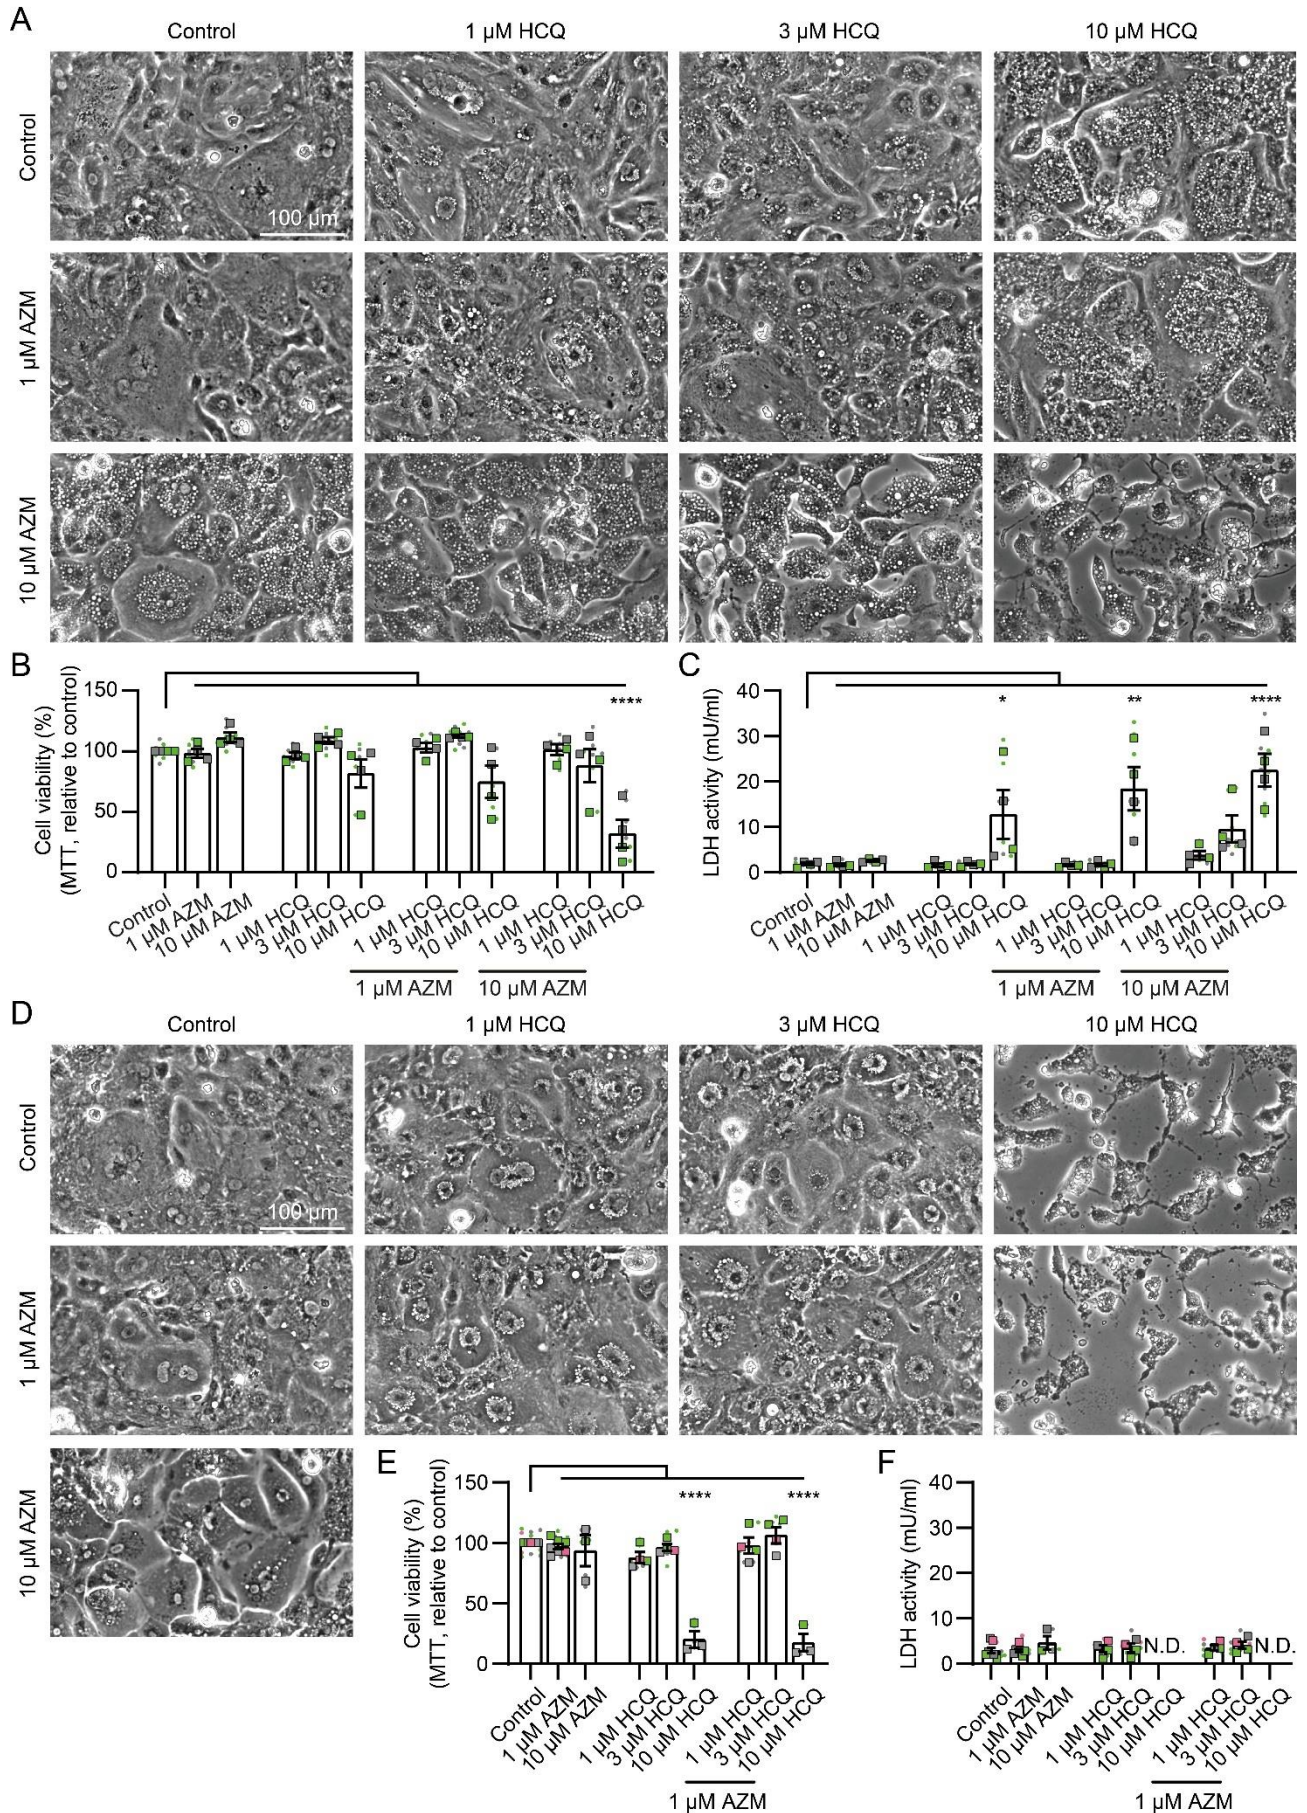

120 **Figure 1: Morphological changes and cytotoxicity in iPSC-CMs treated with HCQ and AZM.**

121 A, Representative brightfield images depicting morphology of iPSC-CMs after 7-day treatments  
122 with HCQ and AZM in different concentrations. Scale bar: 100  $\mu$ m. B, Cell viability after 7-day drug  
123 treatment as determined by measurement of formazan formation in the MTT assay. C, LDH activity  
124 detected in cell supernatants after 7-day drug treatment. D, Representative brightfield images  
125 depicting morphology of iPSC-CMs after 7-day drug treatment and 7-day washout period. Even  
126 after washout, iPSC-CMs treated with a combination of high concentrations of AZM and HCQ show  
127 severe morphological changes and increased cell death. Scale bar: 100  $\mu$ m. E, Cell viability after  
128 7-day drug washout as determined by using the MTT assay. F, LDH activity detected in  
129 supernatants after 7-day drug washout. Data represent technical replicates (points) and means  
130 (squares) of each experiment, N = 3-7 independent experiments using iPSC-CMs from 3 healthy  
131 donors (iBM76.1, iBM76.3 in green; iWTD2.1, iWTD2.3 in grey, isWT7.22 in pink). Lines and errors  
132 show overall mean and SEM. Statistical analysis was performed using one-way ANOVA and  
133 Tukey's multiple comparison test. \*\*  $p < 0.01$ , \*\*\*\*  $p < 0.0001$ . N.D. – not determined.

134

135 *HCQ and AZM affect the structural organization of iPSC-CMs*

136 To investigate the effects of HCQ and AZM on iPSC-CM area, sarcomere organization and  
137 sarcomere length, we performed immunofluorescence staining to detect  $\alpha$ -actinin. To evaluate the  
138 effect of AZM and HCQ on cell area, iPSC-CMs were seeded at low density to monitor single cells.  
139 Single cells were less resistant to drug treatment compared to cells in monolayer by showing  
140 severe morphological changes and cell death, in particular, under treatment with 10  $\mu$ M HCQ and  
141 10  $\mu$ M AZM either alone or in combination (Figure 2A). Therefore, structural analyses of iPSC-CMs  
142 were only performed for treatments with lower drug concentrations, for which cell detachment was  
143 less evident.

144 The 7-day treatment with 1  $\mu$ M AZM alone resulted in an increase in cell area (Figure 2B). The  
145 observed increase in cell area after the 7-day treatment with 1  $\mu$ M AZM did not persist after  
146 washout, but with a slight decrease (Figure 2C). After 7-day treatment with 3  $\mu$ M HCQ alone,  
147 iPSC-CMs showed a reduction in cell area, which was not obvious in the groups treated with 1  $\mu$ M  
148 HCQ alone or with HCQ (1 and 3  $\mu$ M) in combination with 1  $\mu$ M AZM (Figure 2A and B). However,  
149 after the drug washout, iPSC-CMs treated with 1 and 3  $\mu$ M HCQ alone or in combination with 1  $\mu$ M  
150 AZM showed smaller cell areas compared to control cells, indicating persistent cellular shrinking  
151 (Figure 2C).

152 To quantify the effect of HCQ and AZM on sarcomeric organization in iPSC-CMs, the proportion of  
153 cells with structurally organized and disorganized sarcomeres were manually determined based on  
154 the images of iPSC-CMs stained for  $\alpha$ -actinin. Cells with evenly distributed intact sarcomeres

155 across the cell body (occupying > 80% of the cell area) were classified as structurally organized  
156 (Figure 2D, left), while cells with intact sarcomeres distributed exclusively in the center or cell  
157 periphery and cells lacking clearly organized ladder-like sarcomeres were classified as structurally  
158 disorganized (Figure 2D, right). Under basal conditions,  $61 \pm 6\%$  of iPSC-CMs were classified as  
159 structurally organized (Figure 2E). The relatively high portion of cells with disorganized sarcomeres  
160 at basal condition might result from the immaturity of iPSC-CMs undergoing sarcomere assembly.  
161 Treatment with  $1 \mu\text{M}$  AZM and  $1 \mu\text{M}$  HCQ alone revealed no effect on the sarcomere organization  
162 of iPSC-CMs. An increase in the percentage of structurally disorganized cells was found in cells  
163 treated with  $3 \mu\text{M}$  HCQ alone ( $p = 0.055$ ) or in combination with  $1 \mu\text{M}$  AZM ( $p < 0.0001$ , Figure 2E).

164 As another important aspect of iPSC-CM structure, the sarcomere length was measured in the  
165 population of structurally organized cells (Figure 2D, left). The sarcomere length of iPSC-CMs at  
166 basal condition was determined as  $2.04 \pm 0.05 \mu\text{m}$ , which is comparable to a sarcomere length of  
167  $\sim 2.2 \mu\text{m}$  observed in mature cardiomyocytes<sup>21</sup>. After 7-day treatment with  $1 \mu\text{M}$  AZM,  $3 \mu\text{M}$  HCQ,  
168 or the combination of HCQ ( $1$  and  $3 \mu\text{M}$ ) and  $1 \mu\text{M}$  AZM, iPSC-CMs showed a significant reduction  
169 in sarcomere length, which was not obvious in the group treated with  $1 \mu\text{M}$  HCQ alone (Figure 2F).  
170 The strongest reduction in sarcomere length was observed in the group treated with  $1 \mu\text{M}$  AZM  
171 combined with  $3 \mu\text{M}$  HCQ, which demonstrates the negative effects of both compounds on the  
172 organization of the contractile structures. After the subsequent washout period for 7 days,  
173 sarcomere length remained strongly reduced in groups treated with  $3 \mu\text{M}$  HCQ alone and HCQ in  
174 combination with AZM and slightly reduced in iPSC-CMs treated with  $1 \mu\text{M}$  AZM or  $1 \mu\text{M}$  HCQ  
175 alone (Figure 2G).

176 Taken together, these results highlight the negative effect of HCQ and AZM treatments on the  
177 structural characteristics of iPSC-CMs and the persistence of their adverse effects even after drug  
178 washout for 7 days.



Figure 2

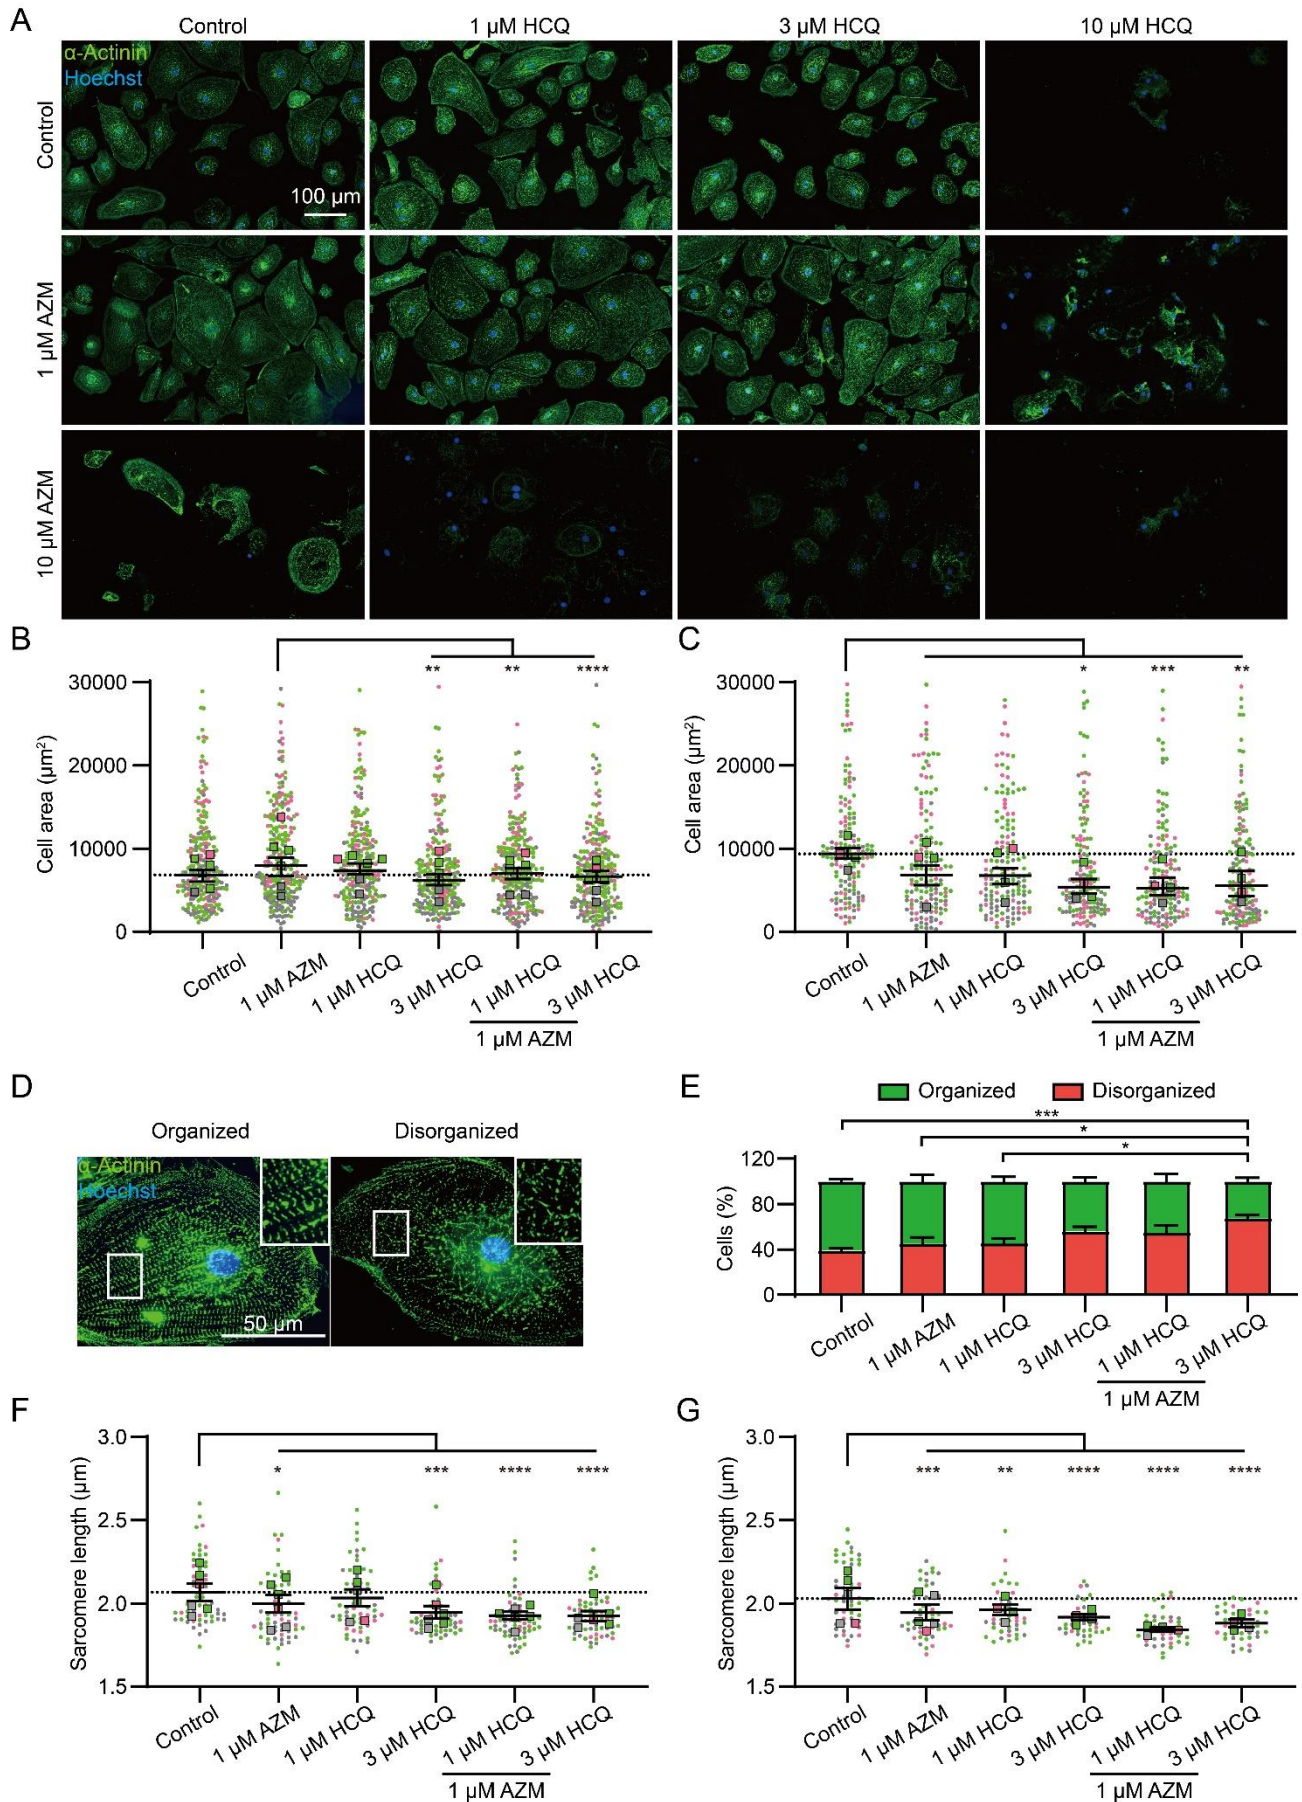



180 **Figure 2: HCQ and AZM cause sarcomeric disorganization in iPSC-CMs.** A, Representative  
181 images of  $\alpha$ -actinin immunostained iPSC-CMs treated with different concentrations of HCQ and  
182 AZM for 7 days. B-C, Analysis of cell areas after 7-day drug treatment (B) and after subsequent 7-  
183 day washout (C). A total of  $n = 160$ -240 cells (40 per experiment) from 6 (B) or 4 (C) independent  
184 experiments per condition were analyzed. Points represent values of single cells and squares the  
185 median values of individual experiments. Lines indicate median and 95% CI of the overall  
186 population. D, Representative images of structurally organized and disorganized iPSC-CMs after  
187 drug treatment for 7 days. E, Percentage of structurally organized and disorganized iPSC-CMs  
188 after 7-day drug treatment. Mean and SEM of 5 independent experiments ( $n = 96$ -272 cells  
189 analyzed per condition from each experiment) are shown. F-G, Sarcomere length after 7-day drug  
190 treatment (F) and after 7-day washout (G). Mean and SEM of  $n = 40$ -60 cells (10 per experiment)  
191 from 6 (F) or 5 (G) independent experiments are shown. Data plots in F, and G show technical  
192 replicates (dots) and mean values (squares). Colors indicate iPSC-CM differentiations from 3  
193 healthy donors (iBM76.1, iBM76.3 in green; iWTD2.1, iWTD2.3 in grey, isWT7.22 in pink).  
194 Statistical analysis was performed using one-way ANOVA and Tukey's multiple comparison test.  
195 \*\*  $p < 0.01$ , \*\*\*  $p < 0.001$ , \*\*\*\*  $p < 0.0001$ .

196

### 197 *HCQ and AZM alter the contractility of iPSC-CMs*

198 The effects of HCQ and AZM on the beating property of iPSC-CMs were investigated using video-  
199 based motion vector analysis (Supplementary Figure 4A). This method allows the quantification of  
200 specific parameters of contraction and relaxation<sup>22, 23</sup>. As a quality control, all beating parameters  
201 remained unchanged for cells cultured with 0.1% DMSO (vehicle) during the 7-day treatment  
202 (Supplementary Figure 3). A progressive alteration of cardiomyocyte beating properties was  
203 observed in the presence of AZM and HCQ during the 7-day treatment period (Figure 3,  
204 Supplementary Figure 4B-G, Supplementary Videos 1, 2). While AZM (1  $\mu$ M) and HCQ (1  $\mu$ M and  
205 3  $\mu$ M) alone had no or less effect on the beating parameters of iPSC-CMs during the 7-day  
206 treatment (Figure 3B-E), strong changes were observed in iPSC-CMs treated with AZM (10  $\mu$ M)  
207 and HCQ (10  $\mu$ M) alone or with AZM (1 and 10  $\mu$ M) in combination with HCQ (1, 3 and 10  $\mu$ M)  
208 (Figure 3B-E, Supplementary Figure 4B-G). Notably, treatment with 10  $\mu$ M HCQ alone or in  
209 combination with 1  $\mu$ M or 10  $\mu$ M AZM led to stop of beating or strongly distorted motion in some  
210 cultures of iPSC-CMs, which could not be included in the analysis (Figure 3A, B). With respect to  
211 beating rate (Figure 3B, Supplementary Figure 4B), iPSC-CMs treated with 10  $\mu$ M AZM alone  
212 showed an increase in beating rate at day 1 but a decrease at day 7 (Supplementary Figure 4B,  
213 Figure 3B), while 10  $\mu$ M HCQ alone progressively increased the beating rate of iPSC-CMs from  
214 day 1 onwards (Figure 3B, Supplementary Figure 4B). A combination of AZM (1 or 10  $\mu$ M) with 10  
215  $\mu$ M HCQ led to even higher beating rates than 10  $\mu$ M HCQ alone (Figure 3B). Moreover, an

216 increased beating rate was also observed in the group treated with 3  $\mu\text{M}$  HCQ in combination with  
217 10  $\mu\text{M}$  AZM, which was absent in the cells treated with 3  $\mu\text{M}$  HCQ alone (Figure 3B). In terms of  
218 contraction time and relaxation time, 10  $\mu\text{M}$  AZM alone showed a progressive reduction, similar to  
219 the group treated with 10  $\mu\text{M}$  HCQ alone during the 7-day treatment (Figure 3C and D,  
220 Supplementary Figure 4D and F). The combination of HCQ and AZM enhanced the decrease of  
221 contraction and relaxation time in a concentration- and time-dependent manner (Figure 3C and D).  
222 Of note, the combination of 10  $\mu\text{M}$  AZM with only 1  $\mu\text{M}$  and 3  $\mu\text{M}$  HCQ led to a further reduction in  
223 contraction and relaxation time.

224 Overall, these data demonstrate that AZM and HCQ directly affect beating rate, as well as  
225 contraction and relaxation behavior of iPSC-CMs in a concentration- and time-dependent manner,  
226 while the combination of AZM with HCQ enhances the effects of HCQ on raising the beating rate of  
227 iPSC-CMs as well as on decreasing contraction time and relaxation time.

Figure 3

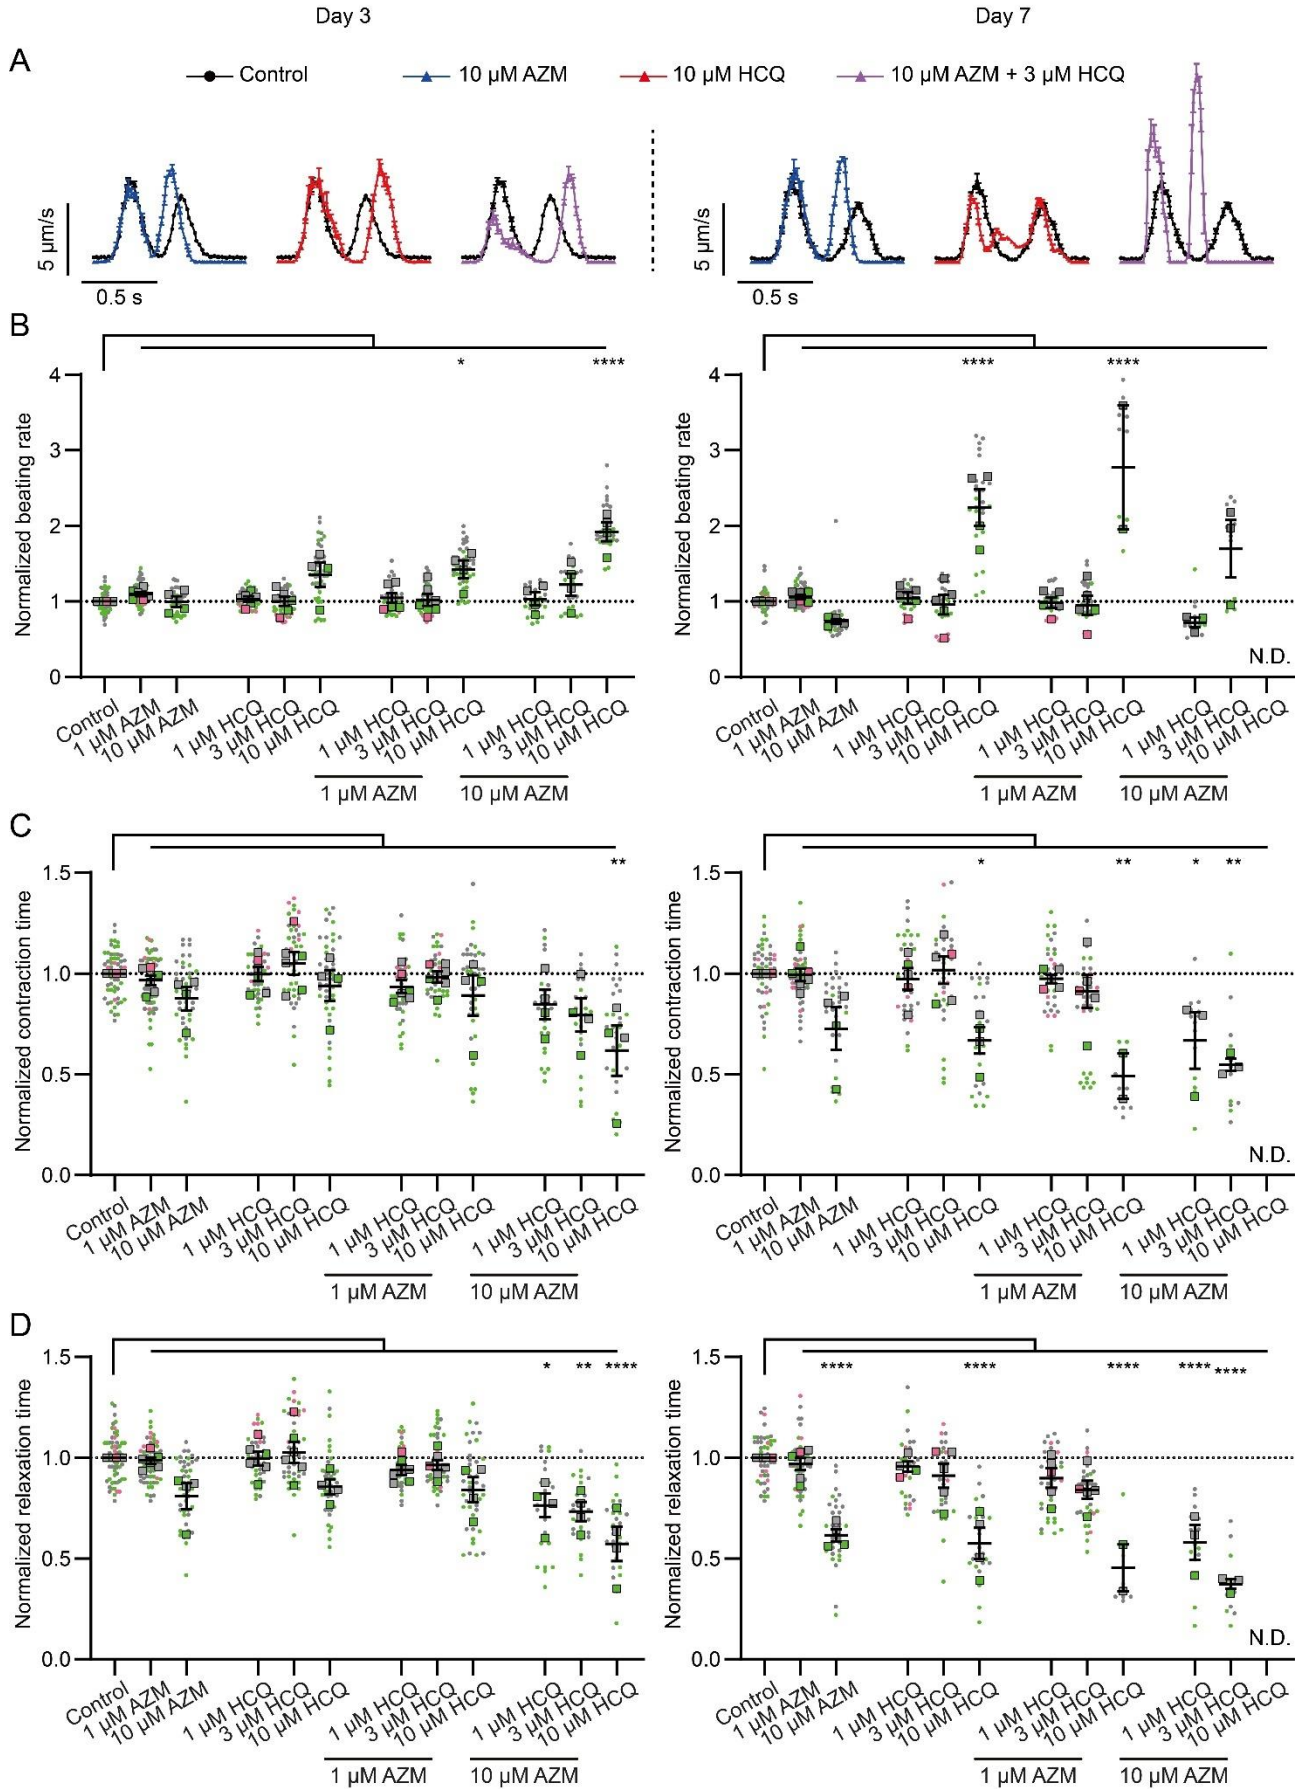

229 **Figure 3: Contractile dysfunctions in iPSC-CMs treated with HCQ and AZM.**

230 A, Representative motion traces observed in iPSC-CMs using vector-based quantification on  
231 treatment days 3 (left) and 7 (right). Values represent mean and SEM of motions from aligned  
232 contraction-relaxation cycles of a representative video. B-D, Effects of AZM and HCQ alone as well  
233 as their combination on the beating rate (B), contraction time (C) and relaxation time (D) on  
234 treatment day 3 (left) and 7 (right). Data represent technical replicates (points, n = 9-54 videos per  
235 condition) and means (squares) of each experiment, N = 4-6 independent experiments using iPSC-  
236 CMs from 3 healthy donors (iBM76.1, iBM76.3 in green; iWTD2.1, iWTD2.3 in grey, isWT7.22 in  
237 pink). Due to the high toxic effects of HCQ or AZM at higher concentrations or in combination,  
238 fewer videos could be analyzed under these conditions. Lines show overall mean values and SEM.  
239 Statistical analysis based on the mean values of the individual experiments using one-way ANOVA  
240 and Tukey's multiple comparison test. \* p < 0.05, \*\* p < 0.01, \*\*\* p < 0.001, \*\*\*\* p < 0.0001.

241

242 *HCQ and AZM lead to the prolongation of field potential duration in iPSC-CMs*

243 To assess the effect of HCQ and AZM on the heart rhythm, the field potential (FP) analysis in  
244 iPSC-CMs were performed using the multi-electrode array (MEA) technique. As shown in Figure  
245 4A and B, the corrected FP duration (FPDc) in the control group remained stable while 1  $\mu$ M AZM  
246 showed no effect on the FPDc during the 14-day recording (7-day drug treatment and subsequent  
247 7-day washout). However, 10  $\mu$ M AZM slightly shortened the FPDc of iPSC-CMs, and drug  
248 washout could not restore it to the basal level (Figure 4A and B). Treatment with HCQ at low  
249 concentrations (1  $\mu$ M and 3  $\mu$ M) had no effect on FPDc, however, iPSC-CMs treated with 10  $\mu$ M  
250 HCQ showed a prolonged FPDc from day 2, which kept rising until day 7 (Figure 4A and C). The  
251 prolongation of FPDc induced by 10  $\mu$ M HCQ was reversible, as drug washout gradually  
252 eliminated this effect.

253 When 1  $\mu$ M AZM was combined with HCQ (1, 3 or 10  $\mu$ M), similar effects as HCQ alone were  
254 observed, showing the prolongation of FPDc only with 10  $\mu$ M HCQ, but to a lesser extent (Figure  
255 4D). The combination of 10  $\mu$ M AZM with 3  $\mu$ M HCQ significantly and reversibly prolonged the  
256 FPDc of iPSC-CMs, which was not observed in cells treated with the combination of 10  $\mu$ M AZM  
257 with 1  $\mu$ M HCQ (Figure 4). When we combined 10  $\mu$ M AZM with 10  $\mu$ M HCQ, the prolonged FPDc  
258 in iPSC-CMs was observed from day 3 till day 8 (Figure 4E). However, we observed that 55% of  
259 iPSC-CMs failed to reveal FP and showed cell death on day 8 (the first day of washout), and 82%  
260 of cultures stopped beating at the end of the experiment (Figure 4A, E, Supplementary Figure 5,  
261 Supplementary Table 1). In terms of beating frequency, 10  $\mu$ M AZM caused a significant increase  
262 in spontaneous beating frequency on day 1 but a lower beating frequency from day 4 onwards  
263 (Supplementary Figure 6A) whereas 10  $\mu$ M HCQ led to a significant increase from day 1 onwards  
264 (Supplementary Figure 6B), which are line with the results observed in the contractility



265 experiments. Interestingly, most drug-treated iPSC-CMs had a slower beating rate than the control  
 266 group during the washout period (Supplementary Figure 6).

Figure 4

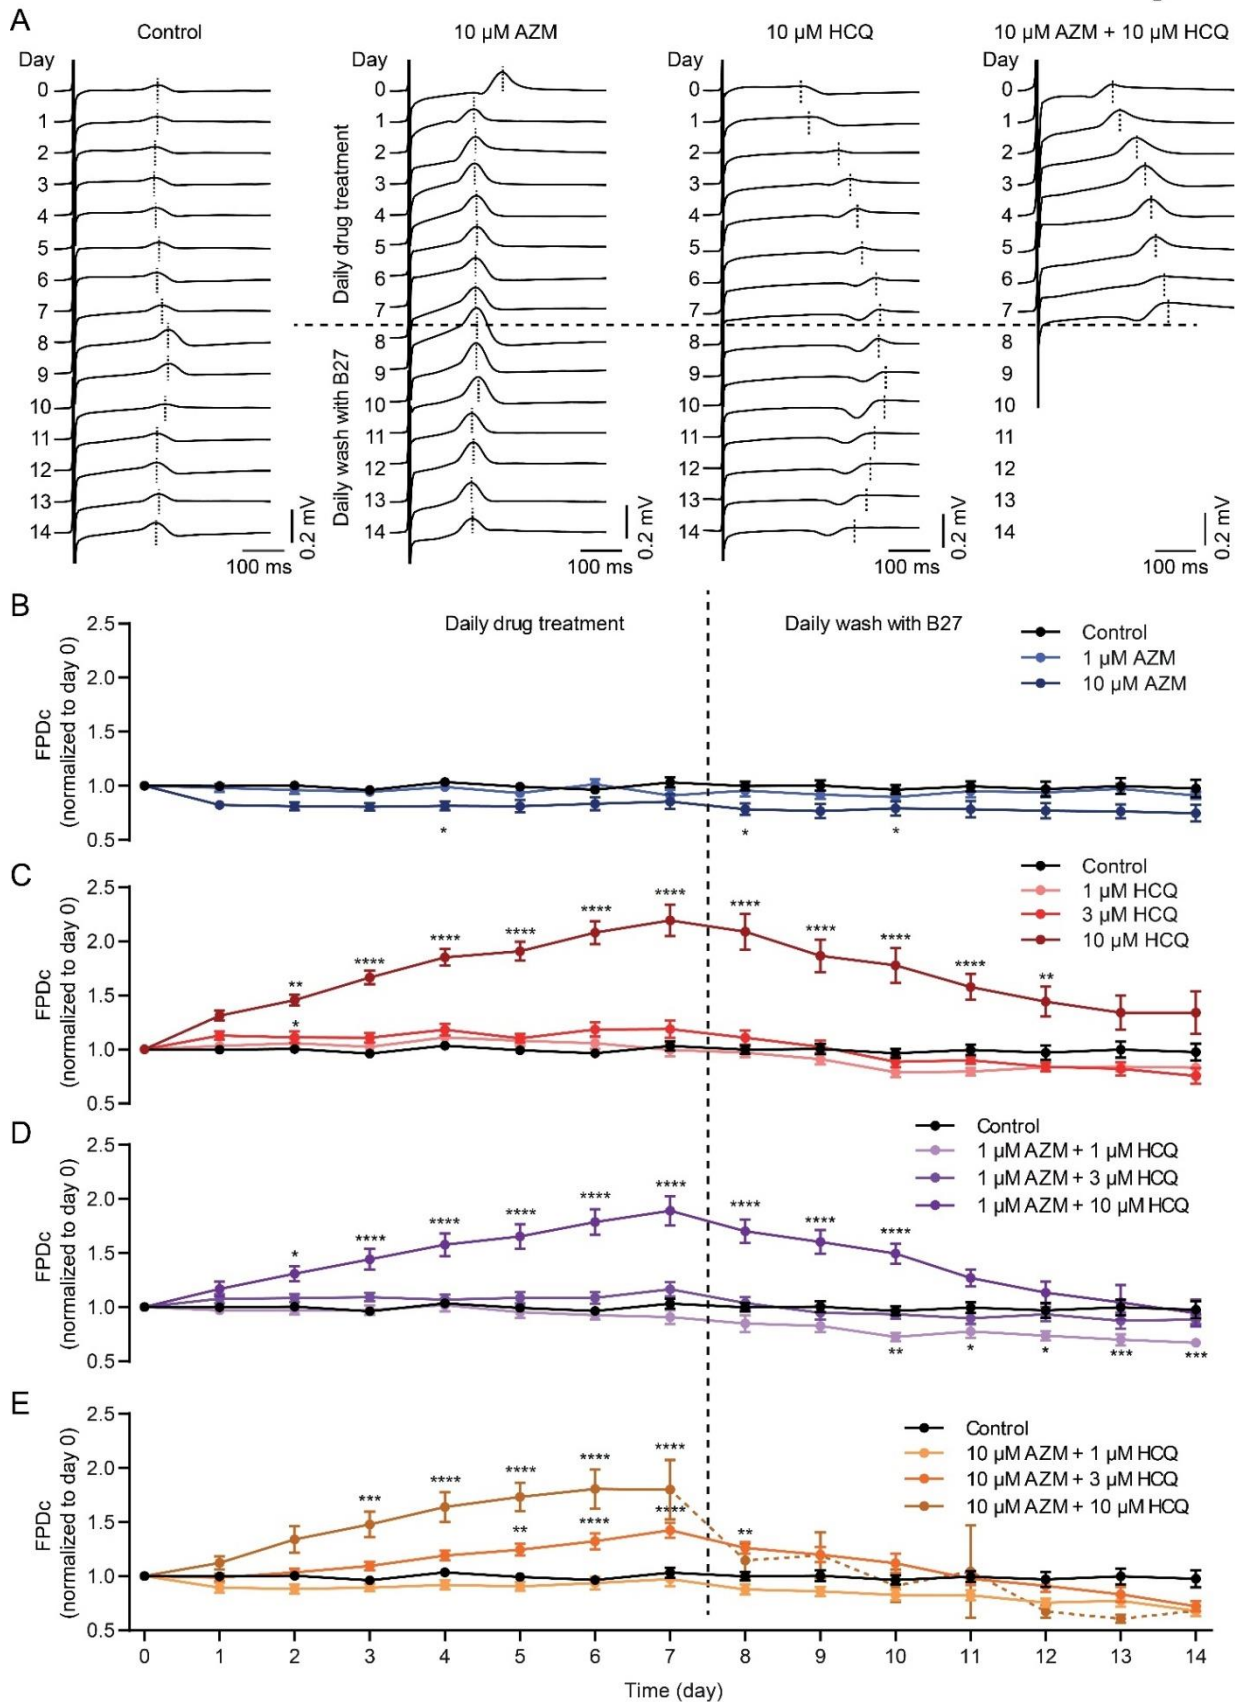

267

268 **Figure 4: Effects of HCQ and AZM on the field potential duration of iPSC-CMs.** A,  
269 Representative recordings of extracellular FP in spontaneous beating iPSC-CMs under different  
270 treatment conditions. iPSC-CMs treated with 10  $\mu$ M AZM and 10  $\mu$ M HCQ in combination stopped  
271 beating at day 8 (one day after initiation of washout). B, C, Effect of AZM (B) or HCQ (C) on the  
272 corrected FPD (FPDc, normalized to day 0) during 7-day treatment and subsequent 7-day  
273 washout. D, E, Effects of HCQ (1, 3 and 10  $\mu$ M) combined with 1  $\mu$ M AZM (D) or 10  $\mu$ M AZM (E)  
274 on FPDc during 7-day treatment and following 7-day washout. iPSC-CMs derived from four donors  
275 were used for MEA recording. For the initial recording (day 0),  $10 \leq n \leq 13$  for all conditions.  
276 Spontaneous beating status of iPSC-CMs is listed in Supplementary Table 1. Two-way ANOVA  
277 with Bonferroni post-hoc test was used for statistical evaluation (\*  $p < 0.05$ , \*\*  $p < 0.01$ , \*\*\*  $p <$   
278  $0.001$  and \*\*\*\*  $p < 0.0001$ ).

279

280 *HCQ and AZM independently and synergistically augment the conduction velocity of iPSC-CMs*

281 Since conduction disorders were the most frequent side effect that appeared in COVID-19 patients  
282 who were administrated with HCQ and AZM<sup>6</sup>, we examined the impact of the two drugs on cardiac  
283 conduction velocity (CV) in iPSC-CM model. As shown in Figure 5, CV of iPSC-CMs in the control  
284 group remained stable during the two-week experiment. While cells treated with 1  $\mu$ M AZM  
285 showed a similar conduction trajectory and CV as in the control group, 10  $\mu$ M AZM led to changes  
286 in trajectory and significantly augmented CV in iPSC-CMs, starting on day 3 after drug treatment,  
287 but reversing on day 3 after drug washout (Figure 5A and B). Similar to AZM, HCQ also resulted in  
288 changes in conduction trajectory and increases in the CV of iPSC-CMs in a concentration-  
289 dependent pattern (Figure 5A and C). The addition of 1  $\mu$ M AZM enhanced the effects caused by  
290 HCQ alone (Figure 5D). Furthermore, when 10  $\mu$ M AZM was applied in addition to HCQ (1, 3, and  
291 10  $\mu$ M), iPSC-CMs from all three groups showed significantly faster transmission of electrical  
292 signals (Figure 5A and E).

293

Figure 5

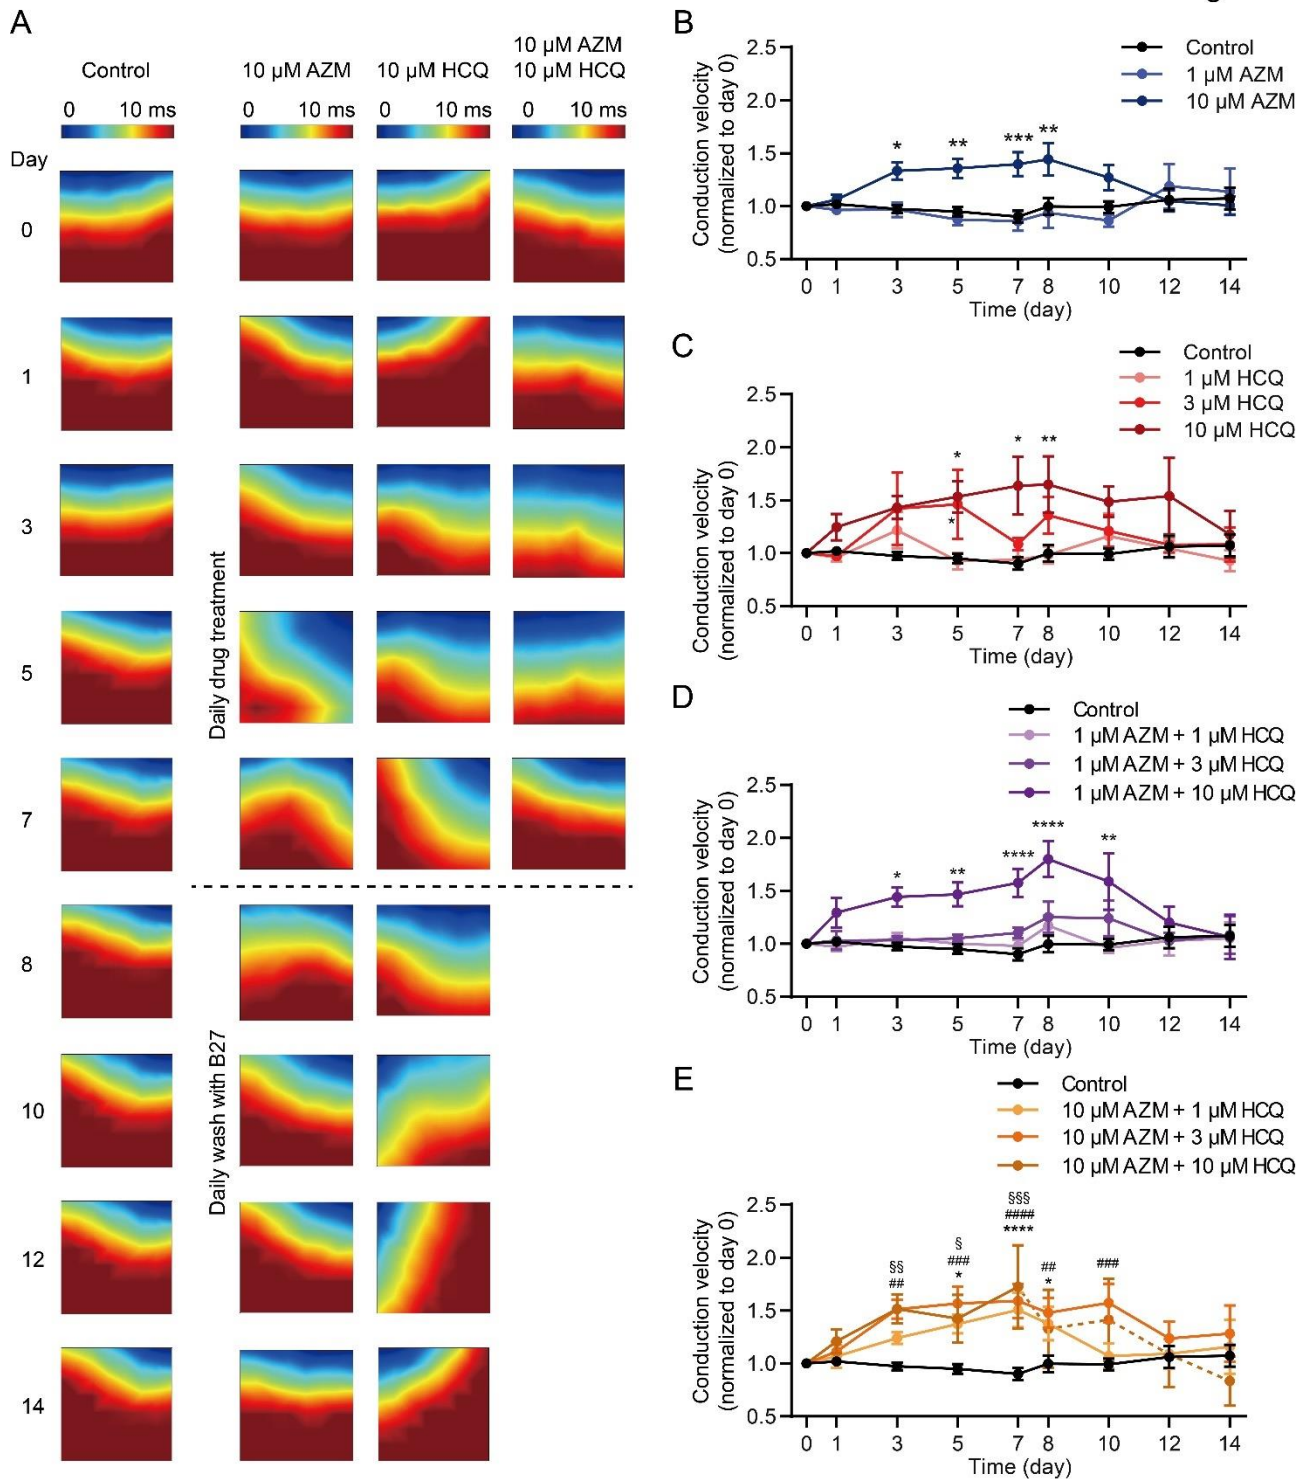

294

295 **Figure 5: Changes in conduction trajectory and augmented CV in iPSC-CMs treated with**  
 296 **AZM and HCQ alone and in combination.** A, Representative heatmaps illustrating the conduction  
 297 trajectories of electrical signals in iPSC-CMs under different conditions during 7-day drug treatment  
 298 and following 7-day washout. Due to cell death, no signal was captured in cells treated with 10  $\mu$ M  
 299 HCQ and 10  $\mu$ M AZM in combination in the washout period. B, C, CV of iPSC-CMs treated with  
 300 AZM (B) and HCQ (C) for 7 days and following washout for 7 days (normalized to day 0). D, E, CV

301 of iPSC-CMs treated with 1  $\mu$ M AZM (D) and 10  $\mu$ M (E) combined with HCQ (1, 3, and 10  $\mu$ M)  
302 during 7-day treatment and following 7-day washout. iPSC-CMs derived from four donors were  
303 used for MEA recording. For the initial recording (day 0),  $10 \leq n \leq 13$  wells for all conditions.  
304 Spontaneous beating status of iPSC-CMs is listed in Supplementary Table 1. Two-way ANOVA  
305 with Bonferroni post-hoc test was used (\*  $p < 0.05$ , \*\*  $p < 0.01$ , \*\*\*  $p < 0.001$ , and \*\*\*\*  $p < 0.0001$ ).  
306

307 *HCQ and AZM synergistically enhance the expression of Cx43 and alter the steady-state kinetics*  
308 *of  $I_{Na}$  in iPSC-CMs*

309 To gain insights into the molecular mechanism of HCQ/AZM-induced CV augmentation, we  
310 analyzed expression of Nav1.5 and Cx43, which are crucial to maintain electrical signal  
311 propagation between CMs<sup>24</sup>. Compared to the control group, the expression of Nav1.5 was slightly,  
312 but not significantly, higher in iPSC-CMs treated with 10  $\mu$ M HCQ for 7 days ( $p > 0.05$ , Figure 6A,  
313 B). Treatment with 10  $\mu$ M AZM did not change Nav1.5 protein levels ( $p > 0.05$ , Figure 6A, B).  
314 Importantly, when we applied 10  $\mu$ M HCQ combined with 10  $\mu$ M AZM to iPSC-CMs, we observed a  
315 2-fold increase in Nav1.5 protein expression ( $p > 0.05$ , Figure 6A, B). In terms of Cx43, 7-day  
316 treatment with 10  $\mu$ M HCQ significantly increased the protein expression by 3-fold ( $p < 0.01$ , Figure  
317 6A, C). While treatment with 10  $\mu$ M AZM alone only slightly increased the Cx43 expression ( $p >$   
318  $0.05$ ), the combination of 10  $\mu$ M HCQ and 10  $\mu$ M AZM synergistically quadrupled the expression of  
319 Cx43 compared to the control group (Figure 6A, C). Similar results were observed using  
320 immunofluorescence staining, revealing a higher expression as well as a strong intracellular  
321 accumulation of Cx43 in iPSC-CMs treated with 10  $\mu$ M HCQ, 10  $\mu$ M AZM, and their combination  
322 (Figure 6D).

323 To further investigate the impact of HCQ and AZM on the function of cardiac sodium channel, we  
324 recorded  $I_{Na}$  in cells treated with 10  $\mu$ M HCQ and/or 10  $\mu$ M AZM for 7 days using an automated  
325 patch-clamp technique (Supplementary Figure 7). Compared to the control group, iPSC-CMs  
326 treated with 10  $\mu$ M AZM alone showed increased membrane capacitances (an indicator for cell  
327 size), while cells treated with 10  $\mu$ M HCQ in combination with 10  $\mu$ M AZM showed lower  
328 membrane capacitances (Supplementary Figure 7B). We could not observe differences regarding  
329 the current density of  $I_{Na}$  in the four groups, except that the reversed current at +70 mV was  
330 smaller in cells treated with combined HCQ and AZM (Supplementary Figure 7A, C). However,  
331 both drugs markedly modified the gating properties of cardiac sodium channel. Compared to the  
332 control group, the steady-state activation curves were leftwards shifted in the groups treated with  
333 HCQ alone or in combination with AZM, but not in iPSC-CMs treated with AZM alone  
334 (Supplementary Figure 7D). Moreover, the steady-state inactivation curves of all the three groups  
335 treated with the drugs showed a rightwards shift (Supplementary Figure 7E).



Figure 6

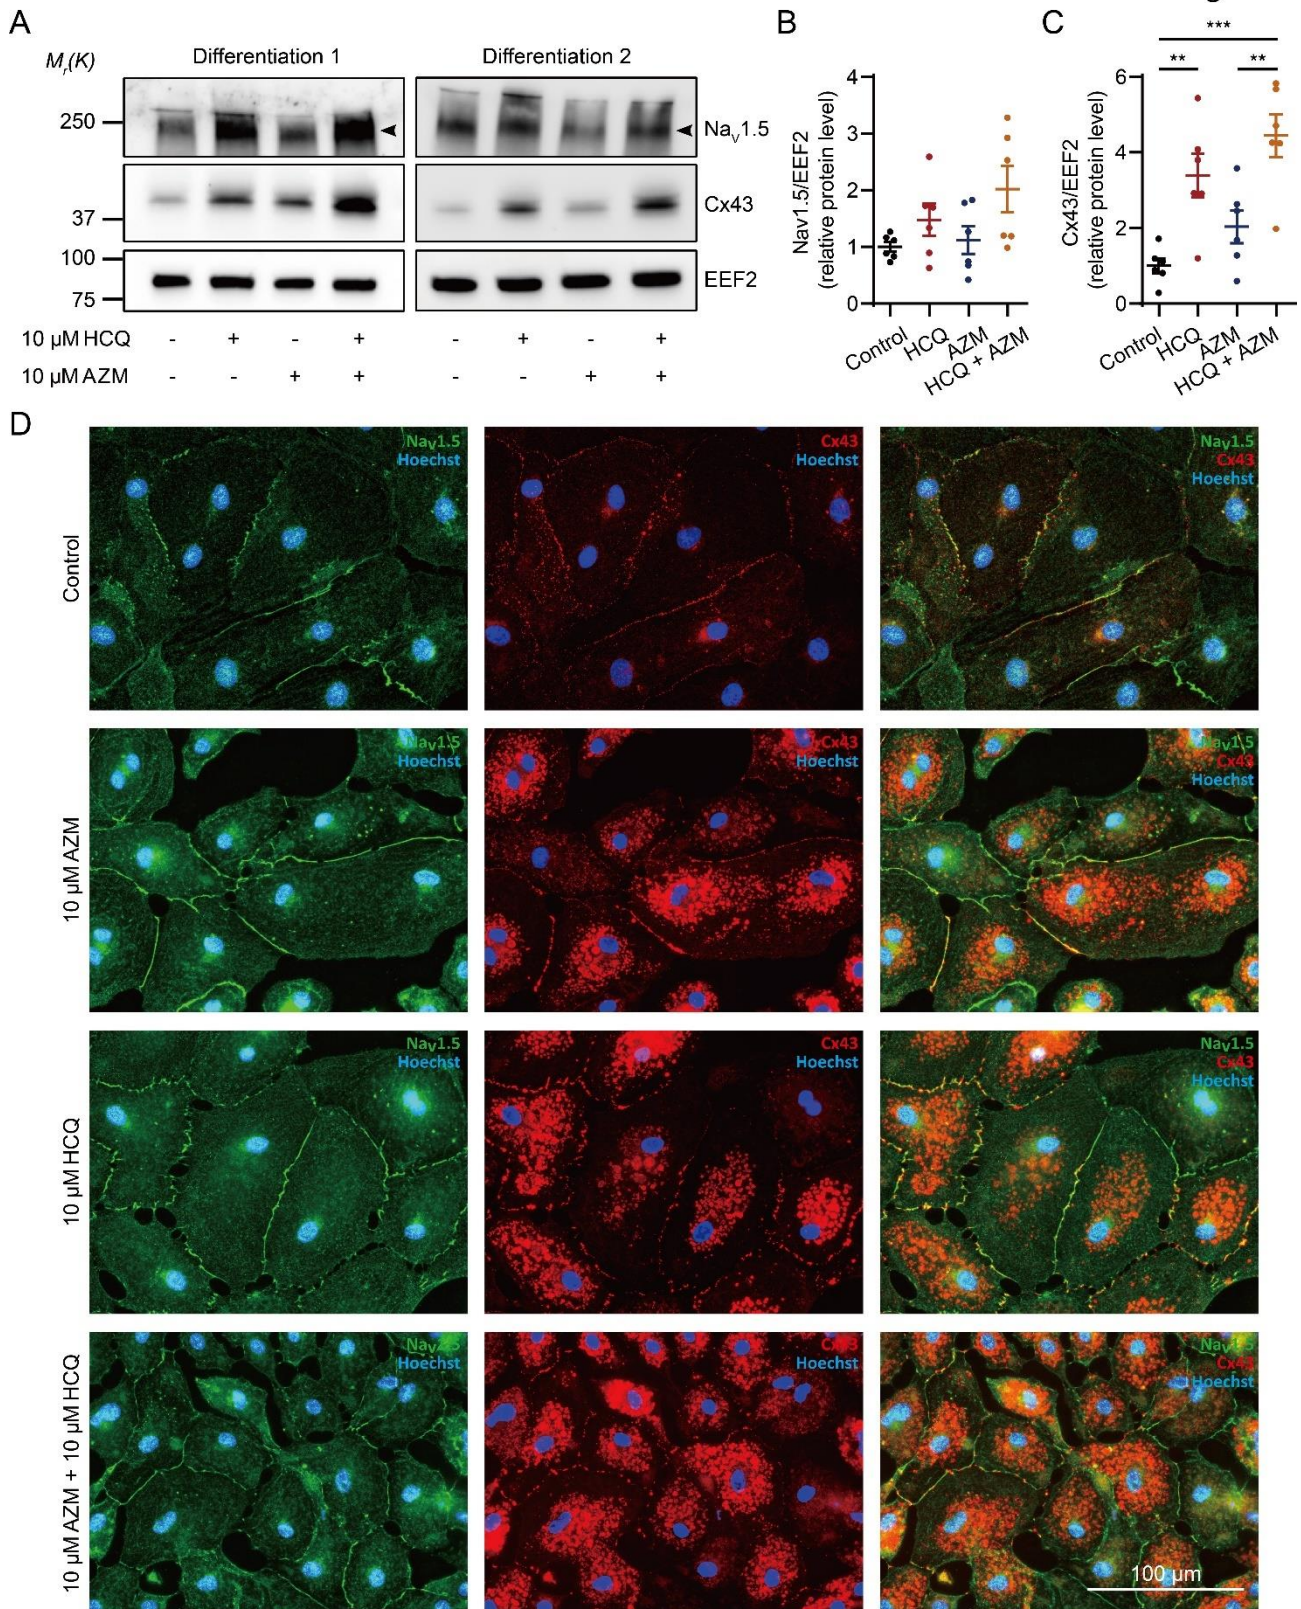

336

337 **Figure 6: Nav1.5 and Cx43 protein expression in iPSC-CMs treated with HCQ and/or AZM.** A,  
 338 Two representative western blots showing the expression of Nav1.5 and Cx43 in iPSC-CMs under  
 339 different drug treatment conditions. B, Quantitation of protein expression levels of Nav1.5 in iPSC-  
 340 CMs under different conditions; N = 6 independent differentiations. C, Quantitation of protein

341 expression of Cx43 in iPSC-CMs under different drug treatment conditions; N = 6 independent  
342 differentiations. D, Representative images showing immunostaining for Nav1.5 (green) and Cx43  
343 (red) in iPSC-CMs under different drug treatment conditions. Cell nuclei are shown in blue  
344 (Hoechst). Statistical evaluation was performed using one-way ANOVA with Tukey's multiple  
345 comparison test (\*\*  $p < 0.01$ , and \*\*\*  $p < 0.001$ ).

346

#### 347 *HCQ and AZM accumulate in iPSC-CMs*

348 As HCQ and AZM have been reported to accumulate in lysosomes and endosomes, we analyzed  
349 the levels of HCQ and AZM in lysates of iPSC-CMs after 7-day drug treatment using mass  
350 spectrometry. Due to reduced cell viability in combination treatments with higher concentrations of  
351 HCQ and AZM, we did not include these groups in the analysis. Our data reveal that cellular levels  
352 of HCQ (Figure 7A) and AZM (Figure 7B) increased in a concentration-dependent manner after the  
353 7-day treatment. Interestingly, levels of HCQ in iPSC-CMs treated with 1  $\mu\text{M}$  HCQ combined with  
354 10  $\mu\text{M}$  AZM were much higher than those in cells treated with 1  $\mu\text{M}$  HCQ alone (Figure 7A) and  
355 accumulation of AZM was increased by co-treatment with 1  $\mu\text{M}$  or 3  $\mu\text{M}$  HCQ (Figure 7B). These  
356 data indicate that the combined treatments with HCQ and AZM facilitate cellular accumulation of  
357 HCQ and AZM and provide further evidence for the synergistic effects of AZM and HCQ through  
358 increased cellular accumulation.

Figure 7

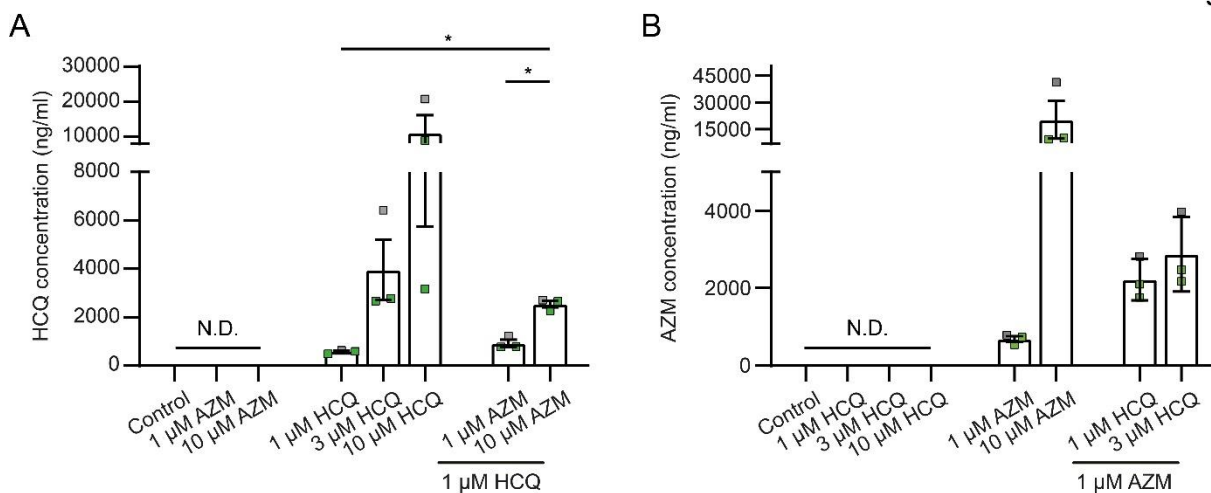

359

360 **Figure 7: Accumulation of HCQ and AZM in iPSC-CMs after 7-day treatment.** A, B,  
361 Concentrations of HCQ (A) and AZM (B) in cell lysates from iPSC-CMs after the 7-day treatment  
362 with HCQ and AZM at different conditions, determined using mass spectrometry. Data represent  
363 mean and SEM of N = 3 independent experiments, performed with iPSC-CMs from 2 healthy  
364 donors (iBM76.1, iBM76.3 in green; iWTD2.1 in grey). N. D., below detection limit. Statistical  
365 evaluation was performed using one-way ANOVA with Tukey's multiple comparison test (\*  $p <$   
366 0.05).



## 367 **Discussion**

368 The combination therapy with HCQ and AZM was initially reported to reduce viral load and to  
369 improve disease progression of COVID-19 patients<sup>2</sup>, which could not be confirmed in follow-up  
370 studies<sup>4, 25</sup>. In contrast, HCQ/AZM combination therapy was associated with increased cardiac  
371 complication rates in comparison to monotherapy with HCQ or AZM<sup>17</sup>. In this study, we examined  
372 the effects of HCQ and AZM on iPSC-CM structure and function for a period of 7 days, similar to  
373 clinical treatment durations of 5 – 10 days<sup>2, 4, 18, 25, 26</sup>. Drug concentrations ranging from 1 to 10  $\mu\text{M}$   
374 were defined based on the antiviral potency of HCQ ( $\text{EC}_{50}$ : 4.2  $\mu\text{M}$ ) and AZM ( $\text{EC}_{50}$ : 2.1  $\mu\text{M}$ )<sup>27</sup> and  
375 the reported dosages used for COVID-19 patients (600 – 800 mg/day for HCQ and 250 – 500  
376 mg/day for AZM). The therapeutic blood levels of HCQ for systemic lupus erythematosus was 1.5  
377  $\mu\text{M}$  to 6  $\mu\text{M}$  in patients receiving a dose of 200 or 400 mg/day<sup>28, 29</sup>. Although AZM plasma level was  
378 rather low, ~ 0.3  $\mu\text{M}$  in patients receiving a dose of 250 mg daily<sup>30, 31</sup>, AZM is known to accumulate  
379 rapidly in cells<sup>31, 32, 33, 34, 35, 36</sup>.

380 As MEA-measurements and video-based motion analysis allow frequent documentation of iPSC-  
381 CM function during 7 days of drug treatment, our study provides first evidence for the functional  
382 consequences of AZM and HCQ under long-term treatment, whereas insights from previous  
383 studies are limited to acute or short-term treatment<sup>16</sup>. We show that both AZM and HCQ negatively  
384 affect the viability, morphology, sarcomeric structure as well as the contractile and  
385 electrophysiological function of iPSC-CMs at clinically relevant concentrations and treatment  
386 duration. Interestingly, the combination with AZM strongly increased HCQ-induced reduction of cell  
387 viability as well as changes in contractile and electrophysiological function. Moreover, we  
388 demonstrate that HCQ and AZM increased Cx43 and Nav1.5 protein levels in a synergistic manner,  
389 which may underlie the severe electrophysiological dysfunction. Mechanistic insights on the  
390 synergistic effect of HCQ and AZM are provided by the increased accumulation of the drugs in  
391 iPSC-CMs when applied in combination.

### 392 393 *HCQ and AZM differentially affect iPSC-CM viability and functionality*

394 In this study, treatments with AZM and HCQ alone revealed that both drugs at higher  
395 concentrations negatively impact cell viability, morphology, sarcomeric structure, the contractility,  
396 and electrophysiological function of iPSC-CMs. At an equimolar concentration of 10  $\mu\text{M}$ , however,  
397 a significantly higher cardiotoxic activity of HCQ than that of AZM was observed, as shown by  
398 lower MTT reduction to formazan, lower cell density and higher LDH activity after the 7-day  
399 treatment (Figure 1). Even after 7 days of drug washout, a progressive cardiotoxic effect of HCQ  
400 was detected not only by the MTT assay, morphological analysis, but also by the increasing  
401 number of iPSC-CM cultures which stopped spontaneous beating (Supplementary Table 1).

402 Besides the reduced cell viability, treatment with 10  $\mu$ M HCQ resulted in a progressive increase in  
403 FPDC, CV and beating frequency in iPSC-CMs during the 7-day treatment. The increased FPDC  
404 was also reported in the guinea pig heart upon acute treatment with 10  $\mu$ M HCQ alone *ex vivo*<sup>16</sup>. In  
405 our study, we observed a slight reduction of FPDC in iPSC-CMs after the 7-day treatment with  
406 10  $\mu$ M AZM alone, while CV was increased to a similar extend as in cells treated with 10  $\mu$ M HCQ.  
407 Interestingly, AZM led to an initial increase in the beating frequency on day 1, but a decrease to  
408 control levels on day 3 and a further decrease until day 7. The AZM-induced increase in the  
409 beating rate at day 1 is in line with the previous study showing that treatment of HL-1 CMs with 100  
410  $\mu$ M AZM for 24 hours dramatically increased the spontaneous beating frequency<sup>31</sup>. Although  
411 several studies reported the electrophysiological effects of HCQ or AZM in cardiomyocytes *in vitro*,  
412 our study is the first to evaluate HCQ and AZM in terms of the effect of clinically relevant long-term  
413 treatment<sup>31</sup>.

414 In agreement with the reduced cell viability and impaired electrophysiological function, iPSC-CMs  
415 also showed altered contractile performance. Treatment with 10  $\mu$ M AZM or HCQ led to decreased  
416 contraction and relaxation time as well as highly varying contraction and relaxation velocities,  
417 indicating that treatments with AZM or HCQ at a high concentration over a long time period  
418 interfere with the ability of iPSC-CMs to contract in a coordinated manner. In a recent publication,  
419 the effects of two cardiotoxic drugs, doxorubicin (DOX) and trastuzumab (TRZ), on the viability and  
420 function of iPSC-CMs were reported<sup>37</sup>. Unlike in our study, spontaneous beating frequency and  
421 electrical propagation of iPSC-CMs were not affected by DOX and TRZ, but the contraction  
422 velocity and displacement (or deformation distance) were reduced. These findings point towards  
423 different mechanisms of drug-induced cardiac complications induced by AZM and HCQ compared  
424 to DOX and TRZ. The adverse effects induced by DOX and TRZ were proposed to be linked to  
425 drug-induced mitochondrial dysfunction and altered cardiac energy metabolism<sup>37</sup>. Based on our  
426 results, we assume that the HCQ-induced increase in CV and alteration in contraction may be  
427 caused by enhanced expression (or accumulation) of Cx43 and altered gating properties of the  
428 sodium channel<sup>37</sup>. Acute treatment with HCQ was reported to have an effect on  $I_{Na}$  with an  $IC_{50}$  of  
429  $113.9 \pm 78.3 \mu$ M, which may explain the reduction in the electrical signal transmission observed in  
430 the guinea pig heart treated with 10  $\mu$ M HCQ *ex vivo*<sup>16</sup>. In our study, we observed no effect of 10  
431  $\mu$ M HCQ on  $I_{Na}$  after the 7-day treatment, but altered gating properties. This may account for the  
432 different effect of HCQ on CV in iPSC-CMs compared to that in the whole heart after acute  
433 treatment with 10  $\mu$ M HCQ. In addition, we cannot exclude the possibilities that these different  
434 effects are due to species differences between humans and guinea pigs.

435 It is worth mentioning that the effects of AZM and HCQ at low concentrations (1 or 3  $\mu$ M) on cell  
436 area, and sarcomere structure of iPSC-CMs were relatively mild but failed to recover to the control  
437 level after 7 days of drug washout, suggesting that AZM and HCQ may induce persistent, long-



438 term damage of iPSC-CM structure. In addition, treatment with AZM caused cellular hypertrophy,  
439 as shown by increased cell area and higher membrane capacitance (Figure 2B, Supplementary  
440 Figure 7B) whereas HCQ (1 or 3  $\mu$ M) resulted in the reduced cell area in a concentration-  
441 dependent pattern.

442 Overall, investigation of the individual effects of AZM and HCQ on iPSC-CMs revealed remarkable  
443 differences in their influence on the beating frequency, contractile properties as well as FPDc.

444

#### 445 *Synergic effects between AZM and HCQ*

446 Higher mortality rates, significantly increased risks for cardiac arrest<sup>15</sup>, and greater QTc  
447 prolongation<sup>18, 19</sup> were observed in patients treated with HCQ and AZM in combination compared to  
448 treatment with either HCQ or AZM. By treating iPSC-CMs with a combination of AZM and HCQ, we  
449 confirmed this synergistic effect, which caused a strong reduction in cell viability, sarcomere  
450 disorganization, conduction abnormalities and contractile dysfunction.

451 Although treatment with 10  $\mu$ M AZM had no effect on cell viability, the combination of 10  $\mu$ M HCQ  
452 with 1  $\mu$ M or 10  $\mu$ M AZM significantly enhanced the cytotoxicity of 10  $\mu$ M HCQ, as indicated by  
453 lower MTT reduction to formazan and increased LDH activity. This potential of AZM to enhance  
454 cytotoxic effects of different drugs was previously demonstrated in cancer cell lines for the  
455 combination of AZM with Lansoprazol<sup>38</sup> or gefitinib<sup>39</sup>.

456 Similar to the viability studies, the combination of AZM with HCQ led to the most pronounced  
457 reductions in cell area, sarcomere length and degree of sarcomeric organization, compared to the  
458 effects of AZM or HCQ alone<sup>40</sup>. In autopsy samples of COVID-19 patients regardless of the  
459 presence of clinical cardiac manifestations or myocarditis, infection of myocardium with SARS-  
460 CoV-2 was confirmed in 60% of patients<sup>40</sup> and CM necrosis, and myofibrillar anomalies were  
461 reported<sup>41, 42</sup>. These findings could be recapitulated using iPSC-CMs infected with SARS-CoV-2<sup>41,</sup>  
462 <sup>42</sup>. However, no data on cytopathic features in the heart of COVID-19 patients with HCQ and AZM  
463 treatment are available. Considering the strong effect of HCQ combined with AZM on iPSC-CMs  
464 on viability and sarcomeric structure demonstrated in our study, this may explain the increased rate  
465 of cardiac complications with this combination treatment. It is of great interest to study whether the  
466 treatment of COVID-19 patients with HCQ and AZM could worsen cell viability and cardiac  
467 structural abnormalities in the heart autopsies.

468 Furthermore, the changes in contractile function and electrophysiological properties were more  
469 pronounced in iPSC-CMs treated with AZM and HCQ in combination. In the presence of 10  $\mu$ M  
470 AZM, the changes in contraction and relaxation time were already enhanced in combination with  
471 1  $\mu$ M HCQ and were even more pronounced with 3  $\mu$ M and 10  $\mu$ M HCQ. In addition, the HCQ-  
472 induced prolongation of FPDc and increase in CV were further exacerbated in the presence of 10

473  $\mu$ M AZM. Of note, documentations of the iPSC-CMs during the 7-day washout period revealed  
474 reversibility of the changes in FPDc and CV in some cultures. However, more iPSC-CM cultures  
475 with AZM and HCQ combination treatment showed beating arrest compared to treatment with HCQ  
476 and AZM alone. These results demonstrate that the application of AZM together with HCQ  
477 worsens the adverse effects of HCQ to induce contractile and electrophysiological dysfunction in  
478 iPSC-CMs. These data are in line with the increased expression of Nav1.5 and Cx43 in iPSC-CMs,  
479 which are induced by HCQ and AZM in a synergistic manner. However, it is difficult to speculate  
480 whether these functional changes can recapitulate the heart functionality in COVID-19 patients  
481 because a plethora of other factors are involved in affecting cardiac functionality. Mimicking the  
482 cytokine storm in patients with severe COVID-19, a recent study demonstrated that treatment of  
483 cardiac microtissue derived from iPSC-CMs with a cocktail of interleukin 1 $\beta$ , interferon- $\gamma$  and  
484 polyinosinic:polycytidylic acid exhibited an increase in contractile force as well as prolongation of  
485 contraction and relaxation time<sup>43</sup>.

486

#### 487 *Mechanistic evidence of AZM and HCQ combination*

488 HCQ and AZM are lysosomotropic compounds known to accumulate in lysosomes and to increase  
489 lysosomal pH, which is critical for the inhibition of viral infection<sup>44</sup>. Determination of drug levels in  
490 iPSC-CMs after the 7-day treatment with AZM or HCQ alone revealed that the cellular levels  
491 correlated with the drug concentrations used. Interestingly, cellular levels of AZM were higher  
492 when HCQ was present and vice versa, indicating that the combined treatment favors the  
493 accumulation of both compounds in iPSC-CMs. Previous study suggested that the ATP-dependent  
494 translocase ABCB1 played an important role in the synergistic effects of AZM and HCQ. ABCB1 is  
495 located in the cell membrane and lysosomal membrane, acts as an AZM-transporter and is known  
496 to be inhibited by HCQ<sup>45</sup>. However, involvement of ABCB1 in the synergistic effect of AZM and  
497 HCQ in iPSC-CMs is unlikely, as RNA-sequencing data from our group as well others reveal that  
498 ABCB1 is not expressed in iPSC-CMs<sup>46, 47</sup>. So far, the mechanism for the increased cellular  
499 accumulation of AZM and HCQ with combined treatment is unclear.

500 Activation of integrated stress response (ISR) pathway and inhibition of autophagosome formation  
501 by AZM and HCQ likely explain the strong intracellular accumulation of Nav1.5 and Cx43. Previous  
502 studies showed that application of CQ increased the abundance of Cx43 in neonatal rat ventricular  
503 myocytes through its lysosomal inhibiting ability and prolongation of Cx43 turnover<sup>48, 49</sup>.  
504 Remarkably, our study shows that the synergistic effect of AZM and HCQ increased Cx43  
505 expression by 4-fold, which was significantly higher than the increase in Cx43 protein expression  
506 observed by treatment with AZM alone. Additionally, 7-day treatment with AZM and HCQ  
507 increased protein expression of Nav1.5 but did not increase sodium current density, suggesting

508 that the availability of functional sodium channels on the membrane was not altered despite the  
509 intracellular accumulation<sup>31</sup>. As cardiac conduction is determined not only by sodium channel  
510 availability but also by gap junction expression and function, our data suggest that the significantly  
511 increased expression of the gap junctional protein Cx43 may contribute to the increased CV in  
512 iPSC-CMs after 7-day treatment with HCQ or HCQ and AZM in combination.

513 Taken together, our results reveal that the more severe effects of the combined treatment with  
514 AZM and HCQ on viability, structure and functionality of iPSC-CMs may be caused by an  
515 increased intracellular accumulation of the drugs. The synergistic upregulation of Cx43 protein  
516 levels by AZM and HCQ provide first mechanistic evidence for the increased cardiac complications  
517 observed with the combination treatment.

518

### 519 *Study limitations*

520 Aiming to gain mechanistic insights for the increased rates of cardiac complications observed for  
521 the combined treatment with AZM and HCQ, we characterized the consequences of the two drugs  
522 as well as their combination on the viability, structure and functionality of iPSC-CMs. Despite iPSC-  
523 CMs represent an important model system to study drug effects on the human heart, different  
524 aspects, including the immaturity of the cells and the lack of the multicellular environment limit, the  
525 predictive value of our findings. Furthermore, modeling the situation in patients with severe COVID-  
526 19 may require infection of iPSC-CMs with SARS-CoV-2 before drug treatment to model structural  
527 and functional abnormalities, which will make the execution of the study technically challenging.

### 528 **Conclusions**

529 Through the systematic investigation of the effects of AZM and HCQ individually as well as in  
530 combination, we show that these two drugs had adverse effects on the viability, structure and  
531 functionality of human cardiomyocytes. These adverse effects get more severe when AZM and  
532 HCQ are applied in combination, thus recapitulating the higher rates of cardiac complications  
533 observed with the AZM/HCQ combination treatment in clinical use. This synergistic activity of AZM  
534 and HCQ in iPSC-CMs is likely driven by the increased intracellular accumulation of the drugs  
535 when applied in combination. Furthermore, we provide evidence that the HCQ-induced increase in  
536 conduction velocity is caused by elevated levels of Cx43, which further increase in combination  
537 with AZM.

538

539

## 540 **Materials and Methods**

### 541 *Culture and maintenance of iPSCs*

542 Human iPSC lines used in this study were reprogrammed from somatic cells of four healthy  
543 individuals. The cell lines iWTD2.1/2.3 (UMGi001-A clone 1 and clone 3) and iBM76.1/76.3  
544 (UMGi005-A clone 1 and clone 3) were generated from dermal fibroblasts and mesenchymal stem  
545 cells, respectively, using STEMCCA lentivirus, and characterized as previously described<sup>46, 50</sup>. The  
546 cell lines isWT1.13 (UMGi014-C clone 3) and isWT7.22 (UMGi020-B clone 22) were generated  
547 from dermal fibroblasts using the integration-free CytoTune-iPS 2.0 Sendai Reprogramming Kit  
548 (Thermo Fisher Scientific), and characterized previously<sup>51</sup>. The iPSC generation was approved by  
549 the Ethics Committee of the University Medical Center Göttingen (approval number: 21/1/11 and  
550 10/9/15) and used following the approval guidelines. To maintain the growth of iPSCs, a chemically  
551 defined E8 medium (Thermo Fisher Scientific) was used, and cells were cultivated on Geltrex  
552 (Thermo Fisher Scientific) coated plates at 37°C with 5% CO<sub>2</sub>. The E8 medium was changed on a  
553 daily basis and cells at ~85% confluency were passaged using Versene (Thermo Fisher Scientific).

### 554 *Differentiation of iPSCs into cardiomyocytes and drug treatment*

555 Directed differentiation of iPSCs into cardiomyocytes was induced by modulating the WNT  
556 signaling cascade as described<sup>52, 53</sup>. In brief, when iPSCs grown on 12-well plates reached  
557 80~90% confluency, the medium was changed from the E8 medium to cardio differentiation  
558 medium, which composed of RPMI 1640 with Glutamax and HEPES (Thermo Fisher Scientific),  
559 0.5 mg/ml human recombinant albumin (Sigma-Aldrich) and 0.2 mg/ml L-ascorbic acid 2-  
560 phosphate (Sigma-Aldrich). To initiate differentiation, cells were incubated with 4 µM CHIR99021  
561 (a GSK3β inhibitor, Millipore) for 48 hours followed by incubation with 5 µM IWP2 (a WNT signaling  
562 inhibitor, Millipore) for additional 48 hours. Thereafter, cells were kept in cardio differentiation  
563 medium for four days with medium change every second day. The first beating cells were detected  
564 on day 8 post differentiation. From day 8, cells were cultivated in RPMI/B27 medium containing  
565 RPMI 1640 with Glutamax and HEPES, supplemented with 2% B27 (Thermo Fisher Scientific).

566 To maintain a long-term culture, iPSC-CMs were replated from 12-well plates into 6-well plates at  
567 day 20 post differentiation. Briefly, cells were incubated with 1 mg/ml collagenase B (Worthington  
568 Biochemical) for 1 hour at 37°C. Detached iPSC-CM clusters were gently collected into a 15 ml  
569 Falcon tube and dissociated with 0.25% trypsin/EDTA (Thermo Fisher Scientific) for 8 min at 37°C.  
570 Dissociated iPSC-CMs were resuspended in cardio digestion medium (80% RPMI/B27 medium,  
571 20% fetal calf serum, and 2 µM thiazovivin) and cultured in Geltrex-coated 6-well plates at a  
572 density of 800,000 cells per well for 24 hours. Afterward, iPSC-CMs were cultivated in RPMI/B27  
573 medium.

574 To perform functional analyses, 70-day-old iPSC-CMs were dissociated again with collagenase B



575 and trypsin stepwise, and replated for different assays. One week after replating, the cells were  
576 treated with HCQ and AZM alone or in combination at different concentrations for 7 days, with daily  
577 medium change, followed by a 7-day washout period with RPMI/B27 medium (Supplementary  
578 Figure 1). HCQ (EMD Millipore) was dissolved in ddH<sub>2</sub>O and AZM (Sigma-Aldrich) was dissolved  
579 in DMSO to prepare 10 mM stock solutions, which were aliquoted and stored at -20°C.

#### 580 *Video-based contraction analysis*

581 Video-based analyses were used to examine drug effects on the contractile parameters of iPSC-  
582 CMs. To this end, iPSC-CMs were replated into Geltrex-coated 48-well plates at a density of  
583 60,000 cells per well one week before drug treatment. Videos were obtained using an ORCA Flash  
584 4.0 V3 CMOS camera (Hamamatsu, 60 FPS, 1024x1024 pixels resolution) on days 0 (before  
585 treatment), 1, 3, 5, and 7 of the treatment-period. Video data were analyzed using the cellular  
586 motion analysis software “*Maia*” (QuoData – Quality & Statistics GmbH) to evaluate the beating  
587 properties<sup>54</sup>. Analysis settings were: block size 20.3 μm (16 pixels), frameshift 100 ms, and  
588 maximum distance shift 8.9 μm (7 pixels). For every condition, videos were obtained from 3  
589 different wells with two videos on different areas of each well. For analysis, data were normalized  
590 to control without drugs of the respective day.

#### 591 *Immunofluorescence staining*

592 For immunostainings, iPSC-CMs were seeded into Geltrex-coated 12-well or 6-well plates  
593 prepared with coverslips at a density of 15,000 or 200,000 cells per well, respectively. After  
594 seeding, cells were cultured for 7 days in RPMI/B27 medium before drug treatment. On day 7  
595 (after drug treatment for 7 days) or day 14 (after drug washout for 7 days), cells were washed 2  
596 times for 5 minutes in relaxation buffer (PBS supplemented with 5 mM EGTA and 5 mM MgCl<sub>2</sub>),  
597 followed by 2 times wash with PBS and fixation in ice-cold methanol-acetone (7:3, v/v) solution for  
598 20 minutes at -20°C. Fixed cells were washed 3 times for 5 minutes with PBS, followed by blocking  
599 in 1% BSA for at least 2 hours at 4°C. For staining, cells were incubated with the following primary  
600 antibodies: anti-α-actinin, clone EA-53 (1:500; mouse monoclonal, IgG1, Sigma-Aldrich, 7811),  
601 anti-Nav1.5 (1:200; rabbit polyclonal, Alomone Labs, ASC-005), and anti-Cx43, clone 2 (1:1000;  
602 mouse monoclonal, IgG1, BD Biosciences, 610061) at 4°C overnight. Afterward, cells were  
603 washed three times with PBS and incubated with the corresponding secondary antibodies (1:1000;  
604 anti-rabbit Alexa Fluor 488, Invitrogen, A11008; anti-mouse Alexa Fluor 488, Invitrogen, A11001;  
605 or anti-mouse Alexa Fluor 546, Invitrogen, A11030) for 1 hour at room temperature. Cell nuclei  
606 were counterstained with Hoechst33342 (1:1000; Thermo Fisher Scientific) in PBS for 20 minutes.  
607 Coverslips were mounted on glass slides using Fluoromount-G mounting medium (Thermo Fisher  
608 Scientific). Stained iPSC-CMs were imaged using a fluorescence microscope (Keyence BZ-  
609 X700E). The exposure time was calibrated based on staining controls performed using only

610 secondary antibody. Quantification of cell area was performed based on  $\alpha$ -actinin stained iPSC-  
611 CMs using Cell Profiler<sup>55</sup> and manual analysis with FIJI<sup>56</sup>. Sarcomere-length was determined  
612 manually using FIJI as described previously<sup>22</sup>. The amount of structurally organized iPSC-CMs  
613 with evenly distributed intact sarcomeres across the cell body (occupying > 80% of the cell area)  
614 and disorganized cells was determined using manual counting.

#### 615 *Multi-electrode array*

616 For FP measurement, iPSC-CMs were seeded in the cavity containing electrodes of the Geltrex-  
617 coated CytoView 6-well MEA plates (Axion BioSystems). Around 300,000 iPSC-CMs were first  
618 resuspended in 20  $\mu$ l cardio digestion medium and seeded in the electrode-containing cavity of the  
619 MEA plates. One hour later, an additional 1 ml of medium was added into each well, and iPSC-  
620 CMs were kept in RPMI/B27 medium for one week before drug treatment. For every batch of  
621 experiment, at least two wells of iPSC-CMs from different plates were treated with the same  
622 condition to avoid plate variability. Spontaneous FP recordings were carried out using the Maestro  
623 Edge equipped with AxIS Navigator software (Axion BioSystems) with a sample rate of 12,500 Hz  
624 at 37°C with 5% CO<sub>2</sub>. From day 0 (the day before treatment) to day 14 (last day for washout), FPs  
625 were recorded daily for all conditions used (Supplementary Figure 1). Several key parameters  
626 including conduction velocity (CV), corrected FPD<sub>C</sub> (corrected by Fridericia's formula) and inter-  
627 beat interval were determined using AxIS Navigator, and further analyzed with AxIS Metric Plotting  
628 Tool (Axion BioSystems). Spontaneous beating frequency was defined as the reciprocal of  
629 averaged inter-beat interval. The mainstream CV values were averaged for one culture.

#### 630 *Automated patch-clamp*

631 To investigate the effect of high concentration of HCQ and AZM on the function of sodium channel,  
632 the properties of  $I_{Na}$  were examined in iPSC-CMs treated with 10  $\mu$ M HCQ alone, 10  $\mu$ M AZM  
633 alone or their combination, respectively. The drug treatment lasted for 7 days with daily medium  
634 change, and iPSC-CMs kept in RPMI/B27 medium served as control. Recording of  $I_{Na}$  was  
635 performed using the Patchliner Quattro (Nanion Technologies GmbH) with low resistance NPC-16  
636 chips at room temperature as described previously<sup>52, 57</sup>. In brief, iPSC-CMs were dissociated gently  
637 into single cells. Capture of single cells and formation of whole-cell configuration were processed  
638 automatically by Patchliner. From a holding potential of -100 mV,  $I_{Na}$  was recorded under pulses  
639 ranging from -90 to +70 mV for 20 ms in 5 mV increment with an interval of 2 s. Currents were  
640 sampled at 25 kHz and low-pass-filtered at 2.9 kHz.

#### 641 *Western Blot*

642 Three-month-old iPSC-CMs were treated with 10  $\mu$ M HCQ, or 10  $\mu$ M AZM, or the combination of  
643 HCQ and AZM for seven days, snap-frozen in liquid nitrogen and stored at -80°C. To detect the  
644 expression of specific proteins, cells were lysed by homogenization in RIPA buffer (150 mM NaCl,

645 50 mM Tris, 1.0% NP-40, 0.5% sodium deoxycholate, 0.1% SDS, 1 mM EDTA, 10 mM NaF, and 1  
646 mM PMSF), supplemented with protease (cComplete mini, EDTA-free) and phosphatase  
647 (PhosSTOP) inhibitors and incubated for 30 min at 4°C with gentle rotation. Cell homogenates  
648 were clarified by centrifugation at 14,000 rpm for 20 min at 4°C and protein concentration was  
649 measured using a BCA assay following the manufacturer's instruction. 30 µg of proteins were  
650 subjected to SDS-PAGE using a 4-15% gradient gel (BioRad) and transferred onto nitrocellulose  
651 membranes. Membranes were blocked in 5% milk in TBS-T for 30-45 min at room temperature and  
652 probed with anti-Cx43, clone 4E6.2 (1:1000; mouse monoclonal, Merck, MAB3067), anti-Nav1.5  
653 (1:200; rabbit polyclonal, Alomone Labs, ASC-005), or anti-EEF2 (1:5000; rabbit polyclonal,  
654 Abcam, ab40812) at 4°C overnight, followed by incubation with horseradish peroxidase-conjugated  
655 secondary antibodies goat anti-mouse (1:10,000; Sigma Aldrich, A2304) or goat anti-rabbit  
656 (1:10,000; Cell Signaling, 7074S), respectively, for 1 hour at room temperature. Proteins were  
657 visualized by chemiluminescence using the Super SignalWest Dura Chemiluminescent Substrate  
658 kit in combination with the Fusion FX Spectra Imaging System (Pqlab). Densitometry analyses of  
659 the immunoblots were performed using ImageJ software and the intensity of individual bands was  
660 normalized to EEF2.

#### 661 *Lactate dehydrogenase measurement*

662 Measurement of LDH activity was performed using LDH assay kit (Abcam, ab102526) according to  
663 the manufacturer's instructions in supernatants of iPSC-CM cultures after 7 days of drug treatment  
664 and after subsequent 7 days of drug washout. Briefly, 50 µl of cell supernatant was mixed with 50  
665 µl substrate solution in a 96 well plate. Absorption was measured at 450 nm in a kinetic mode,  
666 every 2 minutes for 60 minutes (Biotek Synergy HTX). LDH activity was calculated based on a  
667 standard curve according to the manufacturer's instructions (equation 1).

668 Equation 1: Calculation of LDH activity

$$LDH\ activity\ \left[\frac{mU}{ml}\right] = \left(\frac{Amount\ of\ NADH\ in\ sample\ calc.\ from\ standard\ curve[nmol]}{reaction\ time\ [min] \times Sample\ volume\ [ml]}\right) * Dilution\ factor$$

#### 669 *MTT assay*

670 Cell viability was determined using MTT assay kit (Millipore, CT02) according to the manufacturer's  
671 instructions. After drug treatment as well as after drug washout, cells were washed twice with pre-  
672 warmed PBS and incubated in 200 µl RPMI/B27 medium per well with 0.5 mg/ml MTT for 2 hours  
673 at 37°C. Subsequently, 300 µl of isopropanol with 0.04 N HCl was added and samples were mixed  
674 thoroughly by pipetting to facilitate cell lysis and the dissolving of formazan. Absorbance was  
675 measured at 570 nm (formazan) and 630 nm (reference) using plate reader (Biotek Synergy HTX).  
676 Viability was calculated as  $A_{570} - A_{630}$ .

#### 677 *Determination of HCQ and AZM concentration in cell lysates*

678 Intracellular drug accumulation was determined from cell lysates of the MTT assay using mass  
679 spectrometry. After MTT measurement, cell lysates were stored at -20°C for 1-4 days prior to  
680 detection. The stability of HCQ and AZM under these conditions was confirmed for up to 7 days at  
681 -20°C. 25 µl fresh or thawed cell lysates were diluted with 225 µl 2 mM ammonium acetate buffer,  
682 vortexed and centrifuged for 10 minutes (14,000 rpm). 10 µl of the clear supernatants were  
683 injected into the LC-MS/MS, which consists of an UltiMate3000 pump, an autosampler (Dionex,  
684 ThermoScientific) and an API 4000 Tandem mass spectrometer (ABSciex) using positive  
685 Electrospray Ionization (ESI+ ; 4500 V). HCQ and AZM were determined by a Synergi 4µ HydroRP  
686 80A column 150 mm x 3.0 mm (Phenomenex, Aschaffenburg, Germany) using a binary gradient  
687 with 2 mM ammonium acetate buffer and acetonitrile and a flow rate of 0.5 ml/min. The resulting  
688 retention times were 3.0 min for HCQ and 3.2 min for AZM. HCQ and AZM were measured using  
689 the multiple reaction monitoring mode (MRM) with nitrogen as collision gas. The method was  
690 suitable for the quantification of HCQ and AZM in cell lysates over the range from 20 to 1000  
691 ng/ml. Samples with higher concentration were diluted.

#### 692 *Statistics*

693 Results about cell area are presented as median ± 95% CI and results for the other parameters are  
694 presented as mean ± standard error of the mean (SEM). Statistical analysis was performed with  
695 GraphPad Prism 9. One-way ANOVA with Tukey's multiple comparison was used for cell viability,  
696 cell area, sarcomere length, contractility property, protein expression level, and drug accumulation  
697 data. Two-way ANOVA with Bonferroni post-hoc test was used for MEA assay-based FPDc, CV  
698 and beating rate data, as well as Patchliner assay-based  $I_{Na}$  data. p-value < 0.05 was considered  
699 statistically significant.

#### 700 **Acknowledgments**

701 We thank Jessie Pöche, Konstanze Fischer, Ying Ulbricht, Julian Leefmann and Judith Müller  
702 (Dresden) and the entire team from the Stem Cell Unit (Göttingen) for their excellent technical  
703 assistance.

#### 704 **Authors contribution statement**

705 Study conceptualization by WL, XL, MSchu, KG, KN, and SU. Supervision was performed by SU  
706 and KG, and project administration by MSchu, KG, KH, SU and KS. WL, XL, MSP, AS, RO, LC  
707 and MSchu conducted investigation, and WL, XL, MSP, AS, RO, KN, MH, R-PS, MSchu, and KG  
708 performed data curation and formal analysis. WL, XL, KH, SU, MSchu, and KG contributed to the  
709 validation and interpretation of the data. Software was developed by KN, MS, KH, and SU. KG and  
710 KS acquired funding, and KG, SU and KS provided resources. The original draft was prepared by



711 WL, XL, RO, MSP, MSchu, and KG, and reviewed/edited by LC, KN, and SU.

## 712 **Funding**

713 The work was supported by the Free State of Saxony and the European Union EFRE (SAB  
714 projects “PhänoKard” and “PhenoCor” to K. Guan as well as “HERMES” to QuoData – Quality &  
715 Statistics GmbH (K. Simon and S. Uhlig) and K. Guan), by the German Federal Ministry of  
716 Education and Research/German Center for Cardiovascular Research (to L. Cyganek), and by the  
717 German Research Foundation (Project Number 193793266 – SFB1002 S01, to L. Cyganek). M.  
718 Schubert was supported by the MeDDrive START grant from the Medical Faculty at TU Dresden.  
719 A. Strano and M. Hasse were financially supported by the Deutsche Forschungsgemeinschaft  
720 (DFG, German Research Foundation) – Project Number 288034826 – IRTG 2251: “Immunological  
721 and Cellular Strategies in Metabolic Disease”.

## 722 **Disclosures**

723 The authors declare that they have no known competing financial interests or personal  
724 relationships that could have appeared to influence the work reported in this paper.

725

726 **References**

727

- 728 1. Dixit SB, *et al.* Current Approaches to COVID-19: Therapy and Prevention. *Indian J Crit Care Med* **24**,  
729 838-846 (2020).
- 730 2. Gautret P, *et al.* Hydroxychloroquine and azithromycin as a treatment of COVID-19: results of an  
731 open-label non-randomized clinical trial. *Int J Antimicrob Agents* **56**, 105949 (2020).  
732
- 733 3. Andreani J, *et al.* In vitro testing of combined hydroxychloroquine and azithromycin on SARS-CoV-2  
734 shows synergistic effect. *Microbial Pathogenesis* **145**, 104228 (2020).  
735
- 736 4. Furtado RHM, *et al.* Azithromycin in addition to standard of care versus standard of care alone in  
737 the treatment of patients admitted to the hospital with severe COVID-19 in Brazil (COALITION II): a  
738 randomised clinical trial. *Lancet* **396**, 959-967 (2020).  
739
- 740 5. Geleris J, *et al.* Observational Study of Hydroxychloroquine in Hospitalized Patients with Covid-19.  
741 *N Engl J Med* **382**, 2411-2418 (2020).  
742
- 743 6. Lane JCE, *et al.* Safety of hydroxychloroquine, alone and in combination with azithromycin, in light  
744 of rapid wide-spread use for COVID-19: a multinational, network cohort and self-controlled case  
745 series study. *medRxiv*, 2020.2004.2008.20054551 (2020).  
746
- 747 7. Lane JCE, *et al.* Risk of hydroxychloroquine alone and in combination with azithromycin in the  
748 treatment of rheumatoid arthritis: a multinational, retrospective study. *The Lancet Rheumatology*,  
749 (2020).  
750
- 751 8. Li C, Cheng G. Will Hydroxychloroquine Still Be a Game-Changer for COVID-19 by Combining  
752 Azithromycin? *Frontiers in Immunology* **11**, (2020).  
753
- 754 9. Chatre C, Roubille F, Vernhet H, Jorgensen C, Pers Y-M. Cardiac Complications Attributed to  
755 Chloroquine and Hydroxychloroquine: A Systematic Review of the Literature. *Drug Safety* **41**, 919-  
756 931 (2018).  
757
- 758 10. Roden DM, Harrington RA, Poppas A, Russo AM. Considerations for Drug Interactions on QTc in  
759 Exploratory COVID-19 Treatment. *Circulation* **141**, e906-e907 (2020).  
760
- 761 11. Capel RA, *et al.* Hydroxychloroquine reduces heart rate by modulating the hyperpolarization-  
762 activated current *I<sub>f</sub>*: Novel electrophysiological insights and therapeutic potential. *Heart Rhythm* **12**,  
763 2186-2194 (2015).  
764
- 765 12. Huang BH, Wu CH, Hsia CP, Yin Chen C. Azithromycin-induced torsade de pointes. *Pacing Clin*  
766 *Electrophysiol* **30**, 1579-1582 (2007).  
767
- 768 13. Ray WA, Murray KT, Hall K, Arbogast PG, Stein CM. Azithromycin and the Risk of Cardiovascular  
769 Death. *New England Journal of Medicine* **366**, 1881-1890 (2012).  
770

- 771  
772 14. Kezerashvili A, Khattak H, Barsky A, Nazari R, Fisher JD. Azithromycin as a cause of QT-interval  
773 prolongation and torsade de pointes in the absence of other known precipitating factors. *J Interv*  
774 *Card Electrophysiol* **18**, 243-246 (2007).
- 775  
776 15. Rosenberg ES, *et al.* Association of Treatment With Hydroxychloroquine or Azithromycin With In-  
777 Hospital Mortality in Patients With COVID-19 in New York State. *JAMA* **323**, 2493-2502 (2020).
- 778  
779 16. Wang G, *et al.* Mechanistic insights into ventricular arrhythmogenesis of hydroxychloroquine and  
780 azithromycin for the treatment of COVID-19. *bioRxiv*, 2020.2005.2021.108605 (2020).
- 781  
782 17. Chorin E, *et al.* The QT interval in patients with COVID-19 treated with hydroxychloroquine and  
783 azithromycin. *Nat Med* **26**, 808-809 (2020).
- 784  
785 18. Mercurio NJ, *et al.* Risk of QT Interval Prolongation Associated With Use of Hydroxychloroquine  
786 With or Without Concomitant Azithromycin Among Hospitalized Patients Testing Positive for  
787 Coronavirus Disease 2019 (COVID-19). *JAMA Cardiol* **5**, 1036-1041 (2020).
- 788  
789 19. Saleh M, *et al.* Effect of Chloroquine, Hydroxychloroquine, and Azithromycin on the Corrected QT  
790 Interval in Patients With SARS-CoV-2 Infection. *Circ Arrhythm Electrophysiol* **13**, e008662 (2020).
- 791  
792 20. Ramireddy A, *et al.* Experience With Hydroxychloroquine and Azithromycin in the Coronavirus  
793 Disease 2019 Pandemic: Implications for QT Interval Monitoring. *J Am Heart Assoc* **9**, e017144  
794 (2020).
- 795  
796 21. Karbassi E, *et al.* Cardiomyocyte maturation: advances in knowledge and implications for  
797 regenerative medicine. *Nat Rev Cardiol* **17**, 341-359 (2020).
- 798  
799 22. Kolanowski TJ, *et al.* Enhanced structural maturation of human induced pluripotent stem cell-  
800 derived cardiomyocytes under a controlled microenvironment in a microfluidic system. *Acta*  
801 *Biomater* **102**, 273-286 (2020).
- 802  
803 23. Huebsch N, *et al.* Automated Video-Based Analysis of Contractility and Calcium Flux in Human-  
804 Induced Pluripotent Stem Cell-Derived Cardiomyocytes Cultured over Different Spatial Scales.  
805 *Tissue Eng Part C Methods* **21**, 467-479 (2015).
- 806  
807 24. King JH, Huang CL, Fraser JA. Determinants of myocardial conduction velocity: implications for  
808 arrhythmogenesis. *Front Physiol* **4**, 154 (2013).
- 809  
810 25. Cavalcanti AB, *et al.* Hydroxychloroquine with or without Azithromycin in Mild-to-Moderate Covid-  
811 19. *N Engl J Med*, (2020).
- 812  
813 26. Khuroo MS. Chloroquine and hydroxychloroquine in coronavirus disease 2019 (COVID-19). Facts,  
814 fiction and the hype: a critical appraisal. *Int J Antimicrob Agents* **56**, 106101 (2020).
- 815  
816 27. Touret F, *et al.* In vitro screening of a FDA approved chemical library reveals potential inhibitors of

- 817 SARS-CoV-2 replication. *Sci Rep* **10**, 13093 (2020).
- 818
- 819 28. Durcan L, Clarke WA, Magder LS, Petri M. Hydroxychloroquine Blood Levels in Systemic Lupus  
820 Erythematosus: Clarifying Dosing Controversies and Improving Adherence. *J Rheumatol* **42**, 2092-  
821 2097 (2015).
- 822
- 823 29. Yao X, *et al.* In Vitro Antiviral Activity and Projection of Optimized Dosing Design of  
824 Hydroxychloroquine for the Treatment of Severe Acute Respiratory Syndrome Coronavirus 2 (SARS-  
825 CoV-2). *Clin Infect Dis* **71**, 732-739 (2020).
- 826
- 827 30. Jeong BH, *et al.* Peak Plasma Concentration of Azithromycin and Treatment Responses in  
828 *Mycobacterium avium* Complex Lung Disease. *Antimicrob Agents Chemother* **60**, 6076-6083 (2016).
- 829
- 830 31. Yang Z, *et al.* Azithromycin Causes a Novel Proarrhythmic Syndrome. *Circ Arrhythm Electrophysiol*  
831 **10**, (2017).
- 832
- 833 32. Zuckerman JM. The newer macrolides: azithromycin and clarithromycin. *Infect Dis Clin North Am*  
834 **14**, 449-462, x (2000).
- 835
- 836 33. Tett SE, Cutler DJ, Day RO, Brown KF. A dose-ranging study of the pharmacokinetics of hydroxy-  
837 chloroquine following intravenous administration to healthy volunteers. *Br J Clin Pharmacol* **26**,  
838 303-313 (1988).
- 839
- 840 34. Zheng S, Matzneller P, Zeitlinger M, Schmidt S. Development of a population pharmacokinetic  
841 model characterizing the tissue distribution of azithromycin in healthy subjects. *Antimicrob Agents*  
842 *Chemother* **58**, 6675-6684 (2014).
- 843
- 844 35. Liu J, *et al.* Hydroxychloroquine, a less toxic derivative of chloroquine, is effective in inhibiting SARS-  
845 CoV-2 infection in vitro. *Cell Discov* **6**, 16 (2020).
- 846
- 847 36. Araujo FG, Shepard RM, Remington JS. In vivo activity of the macrolide antibiotics azithromycin,  
848 roxithromycin and spiramycin against *Toxoplasma gondii*. *Eur J Clin Microbiol Infect Dis* **10**, 519-524  
849 (1991).
- 850
- 851 37. Kitani T, *et al.* Human-Induced Pluripotent Stem Cell Model of Trastuzumab-Induced Cardiac  
852 Dysfunction in Patients With Breast Cancer. *Circulation* **139**, 2451-2465 (2019).
- 853
- 854 38. Takeda A, *et al.* Macrolide antibiotics enhance the antitumor effect of lansoprazole resulting in  
855 lysosomal membrane permeabilization associated cell death. *Int J Oncol* **57**, 1280-1292 (2020).
- 856
- 857 39. Mukai S, *et al.* Macrolides sensitize EGFR-TKI-induced non-apoptotic cell death via blocking  
858 autophagy flux in pancreatic cancer cell lines. *Int J Oncol* **48**, 45-54 (2016).
- 859
- 860 40. Lindner D, *et al.* Association of Cardiac Infection With SARS-CoV-2 in Confirmed COVID-19 Autopsy  
861 Cases. *JAMA Cardiol* **5**, 1281-1285 (2020).



- 862  
863 41. Bailey AL, *et al.* SARS-CoV-2 Infects Human Engineered Heart Tissues and Models COVID-19  
864 Myocarditis. *JACC Basic Transl Sci* **6**, 331-345 (2021).
- 865  
866 42. Perez-Bermejo JA, *et al.* SARS-CoV-2 infection of human iPSC-derived cardiac cells reflects  
867 cytopathic features in hearts of patients with COVID-19. *Sci Transl Med* **13**, (2021).
- 868  
869 43. Mills RJ, *et al.* BET inhibition blocks inflammation-induced cardiac dysfunction and SARS-CoV-2  
870 infection. *Cell* **184**, 2167-2182 e2122 (2021).
- 871  
872 44. Norinder U, Tuck A, Norgren K, Munic Kos V. Existing highly accumulating lysosomotropic drugs  
873 with potential for repurposing to target COVID-19. *Biomed Pharmacother* **130**, 110582 (2020).
- 874  
875 45. Scherrmann JM. Intracellular ABCB1 as a Possible Mechanism to Explain the Synergistic Effect of  
876 Hydroxychloroquine-Azithromycin Combination in COVID-19 Therapy. *AAPS J* **22**, 86 (2020).
- 877  
878 46. Cyganek L, *et al.* Deep phenotyping of human induced pluripotent stem cell-derived atrial and  
879 ventricular cardiomyocytes. *JCI Insight* **3**, (2018).
- 880  
881 47. Feyen DAM, *et al.* Metabolic Maturation Media Improve Physiological Function of Human iPSC-  
882 Derived Cardiomyocytes. *Cell Rep* **32**, 107925 (2020).
- 883  
884 48. Laing JG, Tadros PN, Green K, Saffitz JE, Beyer EC. Proteolysis of connexin43-containing gap  
885 junctions in normal and heat-stressed cardiac myocytes. *Cardiovasc Res* **38**, 711-718 (1998).
- 886  
887 49. Mauthe M, *et al.* Chloroquine inhibits autophagic flux by decreasing autophagosome-lysosome  
888 fusion. *Autophagy* **14**, 1435-1455 (2018).
- 889  
890 50. Streckfuss-Bomeke K, *et al.* Comparative study of human-induced pluripotent stem cells derived  
891 from bone marrow cells, hair keratinocytes, and skin fibroblasts. *European heart journal* **34**, 2618-  
892 2629 (2013).
- 893  
894 51. Rossler U, *et al.* Efficient generation of osteoclasts from human induced pluripotent stem cells and  
895 functional investigations of lethal CLCN7-related osteopetrosis. *J Bone Miner Res* **36**, 1621-1635  
896 (2021).
- 897  
898 52. Li W, *et al.* Establishment of an automated patch-clamp platform for electrophysiological and  
899 pharmacological evaluation of hiPSC-CMs. *Stem Cell Res* **41**, 101662 (2019).
- 900  
901 53. Luo X, *et al.* IP3R-Mediated Compensatory Mechanism for Calcium Handling in Human Induced  
902 Pluripotent Stem Cell-Derived Cardiomyocytes With Cardiac Ryanodine Receptor Deficiency. *Front*  
903 *Cell Dev Biol* **8**, 772 (2020).
- 904  
905 54. QuoData. Quality & Statistics GmbH, <https://quodata.de/>, accessed 08/19/2021.
- 906

- 907 55. McQuin C, *et al.* CellProfiler 3.0: Next-generation image processing for biology. *PLoS Biol* **16**,  
908 e2005970 (2018).
- 909  
910 56. Schindelin J, *et al.* Fiji: an open-source platform for biological-image analysis. *Nat Methods* **9**, 676-  
911 682 (2012).
- 912  
913 57. Li W, *et al.* Disease Phenotypes and Mechanisms of iPSC-Derived Cardiomyocytes From Brugada  
914 Syndrome Patients With a Loss-of-Function SCN5A Mutation. *Front Cell Dev Biol* **8**, 592893 (2020).
- 915  
916

917 **Supplementary information**

Figure S1

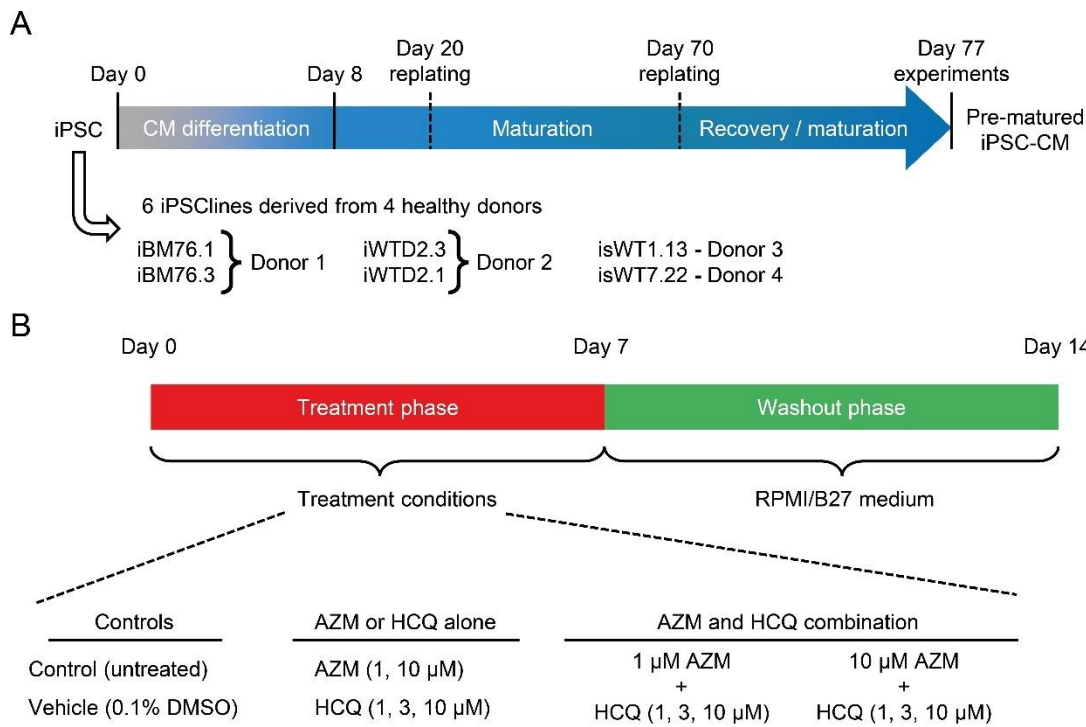

918

919 **Supplementary Figure 1: Experimental scheme.** A, Timeline of iPSC-CM differentiation and  
 920 maturation under long-term cultivation for 77 days before the drug treatment and functional  
 921 analysis. iPSC lines derived from 4 healthy donors were used in the experiments to consider  
 922 different genetic background. B, Scheme of all conditions used in the study with drug treatment  
 923 and washout phases.

Figure S2

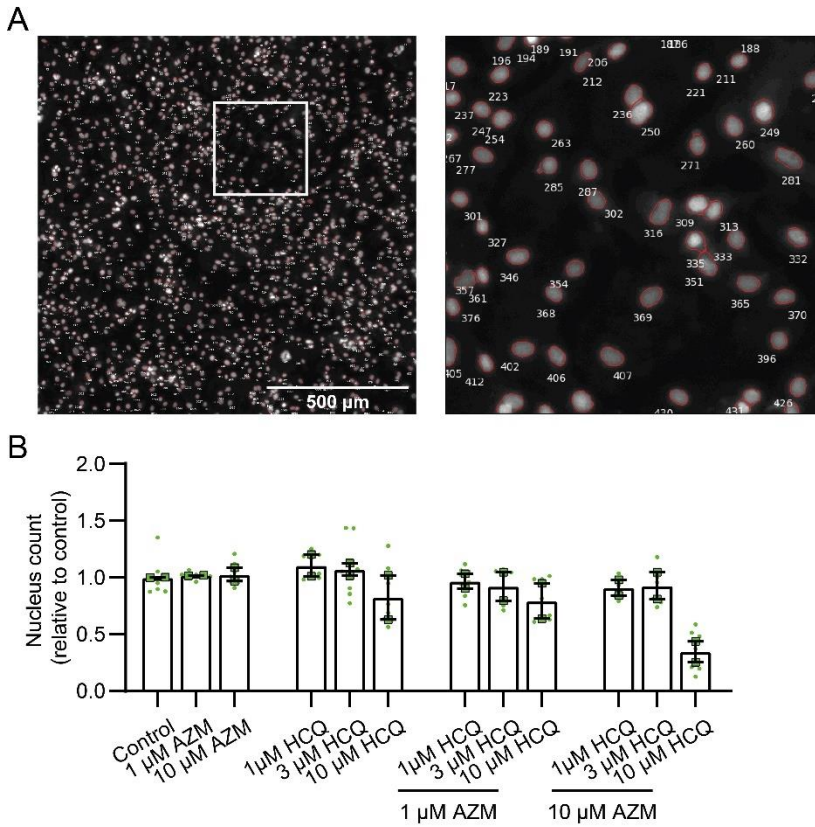

924

925 **Supplementary Figure 2: Quantification of nucleus number after 7-day treatment with the**  
926 **drugs.** A, Representative images of iPSC-CMs stained with Hoechst33342 and nucleus count  
927 using CellProfiler software. B, Nucleus counts after the 7-day drug treatment relative to the control  
928 group (n = 7-8 images from 2 independent experiments). Data represent mean and SEM of n = 2  
929 different iPSC-CM differentiations from healthy donor iBM76.



Figure S3

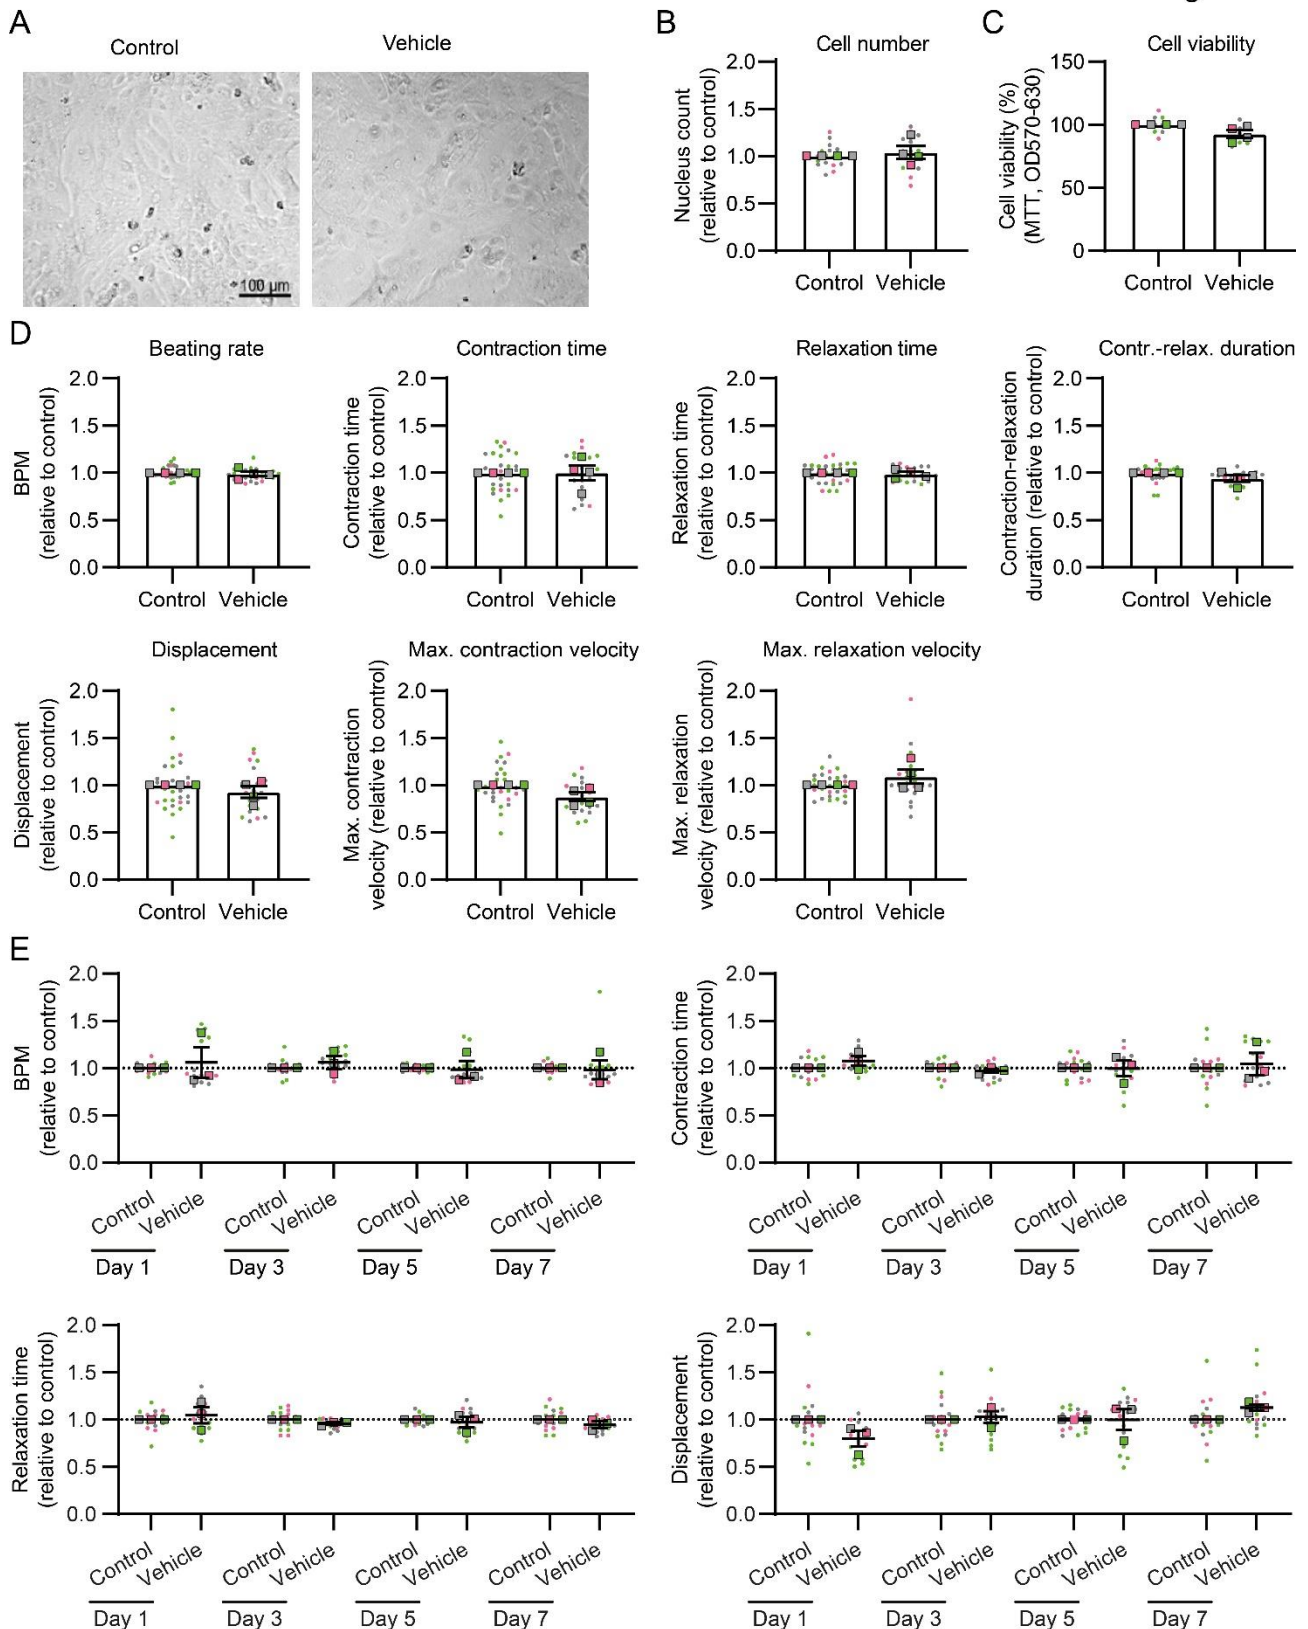

930

931 **Supplementary Figure 3: Cell viability and contractility in vehicle (0.1% DMSO) treated iPSC-**

932 **CMs.** A, Brightfield images of iPSC-CMs after 7-day culture with RPMI/B27 medium (control) or in

933 the presence of 0.1% DMSO vehicle showing that vehicle treatment did not affect CM morphology.

934 B, Cell density was investigated based on the quantification of cell nucleus counts using  
935 Hoechst33342 staining and fluorescence imaging. C, Cell viability examined by MTT assay. D,  
936 Quantification of contractile function using video-based motion vector analysis. Data represent  
937 mean and SEM of  $n = 4$  different iPSC-CM differentiations from 3 healthy donors indicated by  
938 different colours (iBM76.3 in green, iWTD2.1 in grey, isWT7.22 in pink). Points show technical  
939 replicates and squares represent mean values. E, Changes in beating parameters over time.  
940 Pooled individual replicates from  $n = 3$  different iPSC-CM differentiations (iBM76.3 in green,  
941 iWTD2.1 in grey, isWT7.22 in pink).

Figure S4

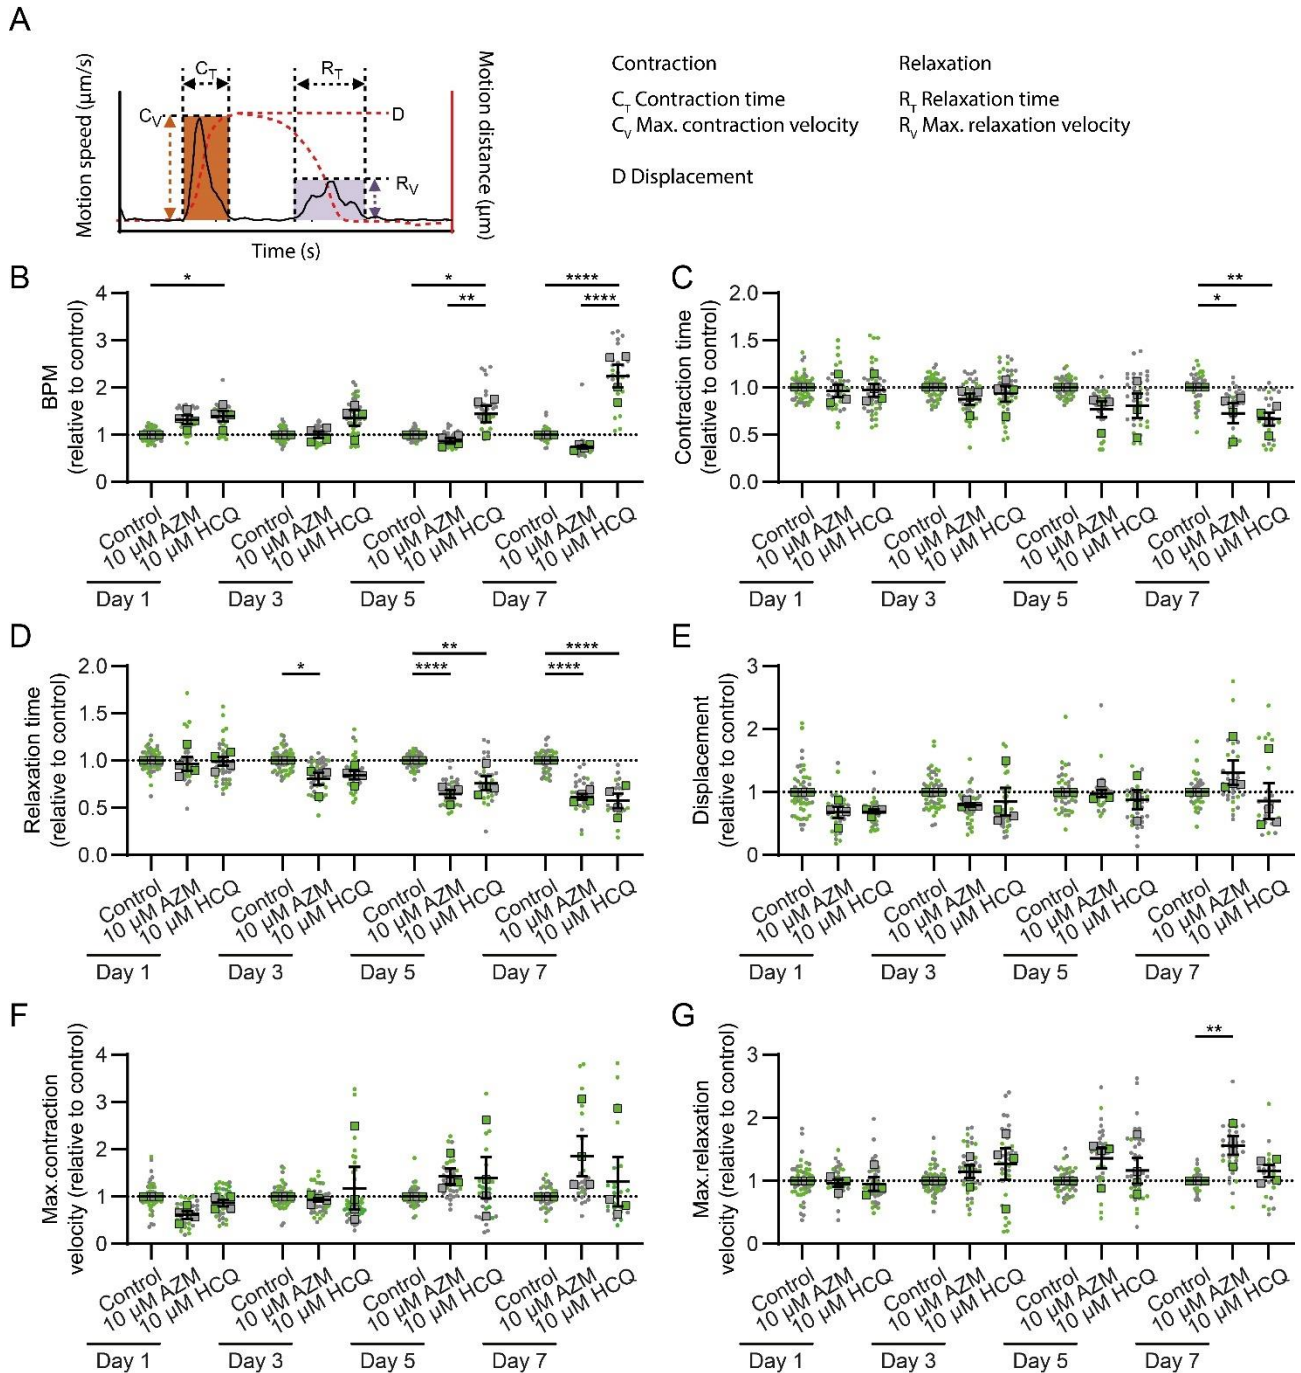

942

943 **Supplementary Figure 4: Effects of AZM and HCQ treatments on contraction parameters.** A,  
 944 Scheme of beating trace and calculated parameters using Maia motion analysis software. B-G,  
 945 Effects of 10  $\mu$ M AZM and 10  $\mu$ M HCQ during the treatment period of 7 days. Shown are data of  
 946 the beating rate (B), contraction time (C), relaxation time (D), displacement (E), max. contraction  
 947 velocity (F) and max. relaxation velocity (G) which were normalized to the control. Points represent  
 948 technical replicates and squares depict the means of individual experiments using iPSC-CM from 3  
 949 healthy donors indicated by different colors (iBM76.3 in green, iWTD2.1 in grey, isWT7.22 in pink).  
 950 Lines indicate overall mean. n = 26-54 videos from 4-5 experiments were analyzed per group.

951 Statistical analysis was performed based on the mean values of the individual experiments using  
952 two-way ANOVA and Tukey's multiple comparison test. \*  $p < 0.05$ , \*\*  $p < 0.01$ , \*\*\*  $p < 0.001$ , \*\*\*\*  $p$   
953  $< 0.0001$ .

954

955

Figure S5

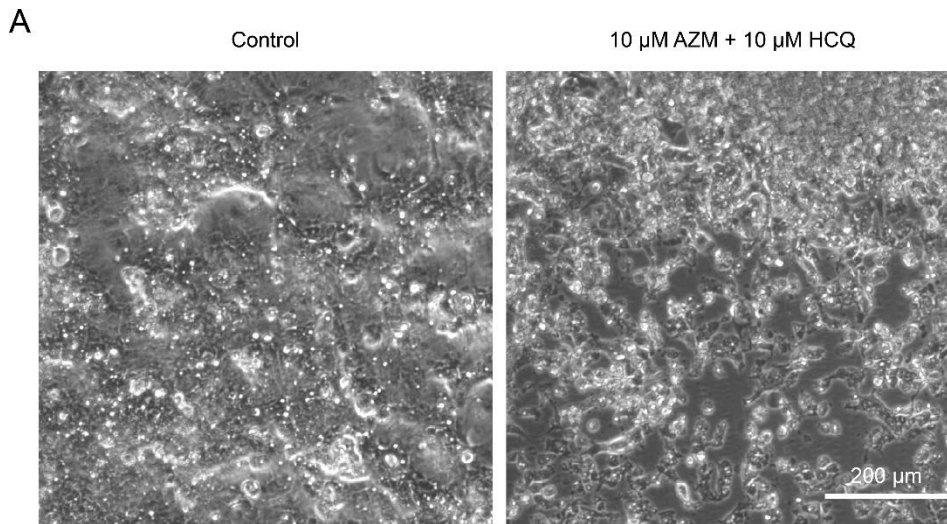

956

957 **Supplementary Figure 5: Representative images of iPSC-CMs on MEA plate.** A, B,  
958 Morphology of iPSC-CMs in the vehicle treated (A) and 10  $\mu$ M AZM and 10  $\mu$ M HCQ treated (B)  
959 groups at day 8. Combination treatment with 10  $\mu$ M AZM and 10  $\mu$ M HCQ increased the number of  
960 dead cells.



Figure S6

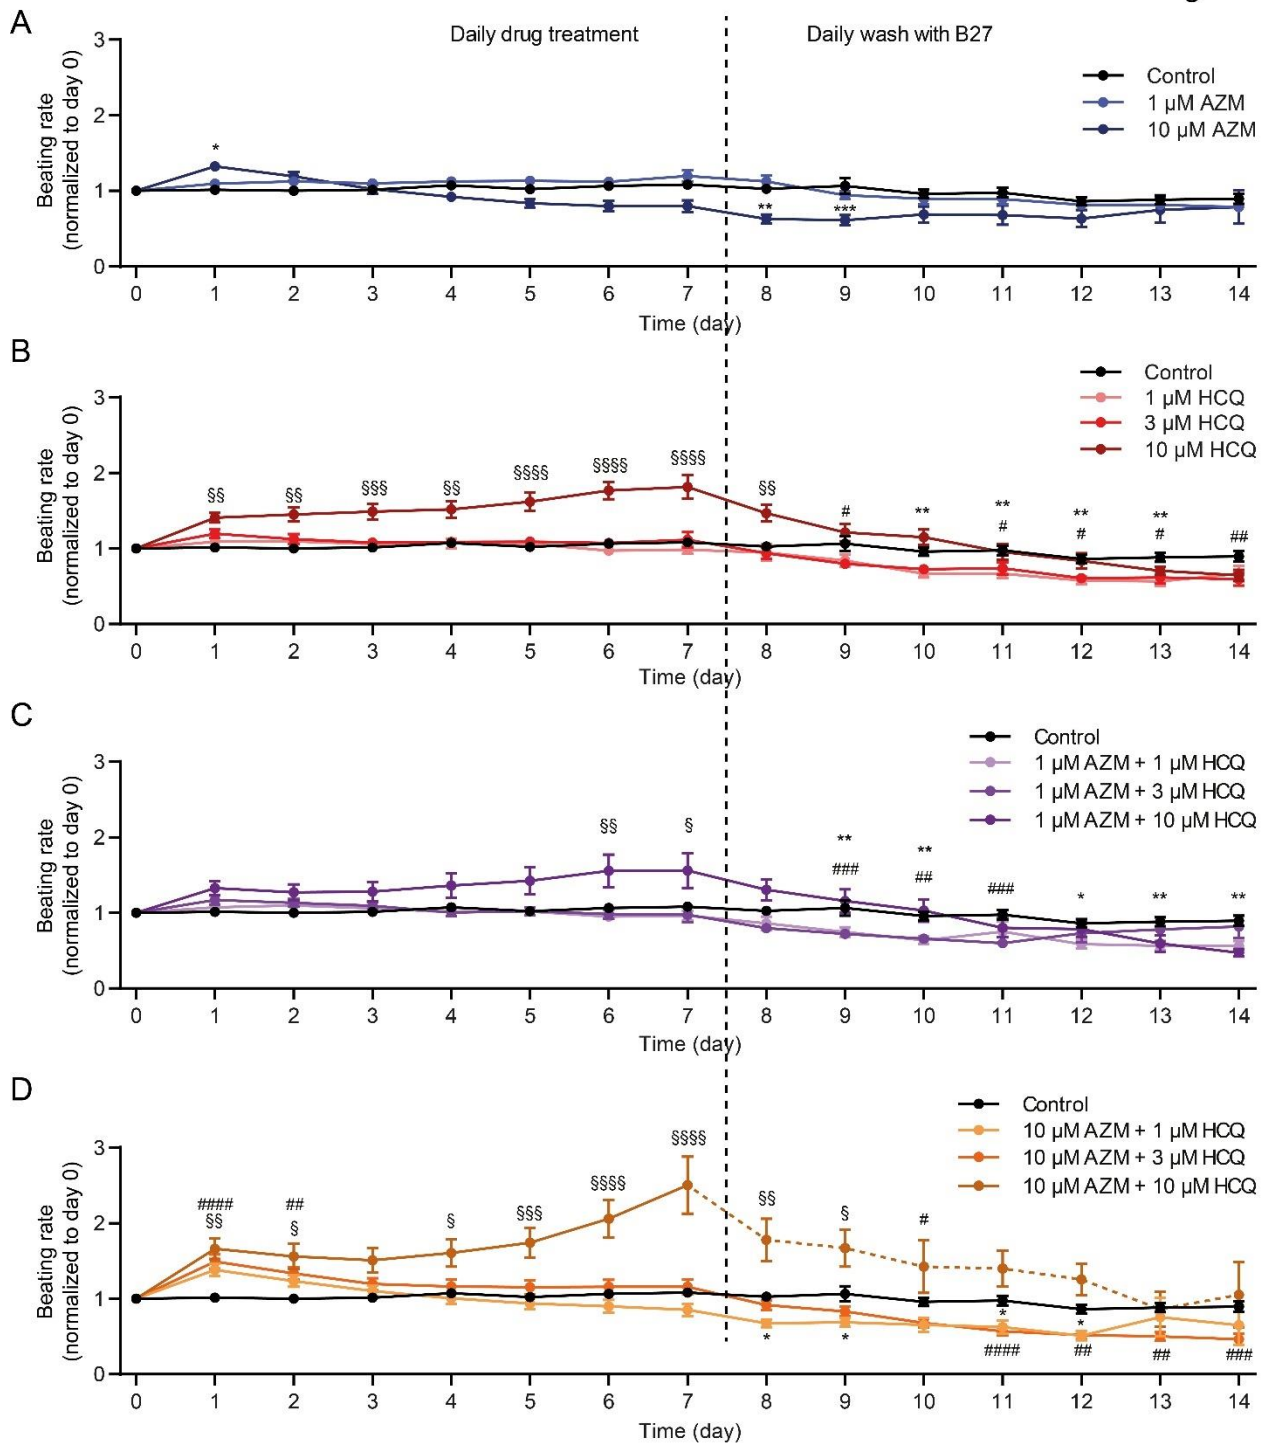

961

962 **Supplementary Figure 6: Effects of HCQ and AZM treatments on the beating rates of iPSC-**  
 963 **CMs.** A, Effect of AZM treatment (1 and 10  $\mu$ M) on spontaneously beating rates (normalized to day  
 964 0) during 7-day drug treatment (left) and following 7-day washout (right). B, Effect of HCQ  
 965 treatment (1, 3 and 10  $\mu$ M) on spontaneously beating rates during 7-day drug treatment (left) and  
 966 following 7-day washout (right). C, Effect of HCQ (1, 3, and 10  $\mu$ M) combined with 1  $\mu$ M AZM on  
 967 spontaneous beating rates during 7-day drug treatment (left) and following 7-day washout (right).  
 968 D, Effect of HCQ (1, 3, and 10  $\mu$ M) combined with 10  $\mu$ M AZM on spontaneously beating rates



969 during 7-day drug treatment (left) and following 7-day washout (right). iPSC-CMs derived from four  
970 donors were used for MEA recording. For the initial recording (day 0),  $10 \leq n \leq 13$  for all conditions.  
971 Numbers of beating iPSC-CM cultures used for the analysis are listed in Supplementary Table 1.  
972 Two-way ANOVA with Bonferroni post-hoc test (\*  $p < 0.05$ , \*\*  $p < 0.01$ , \*\*\*  $p < 0.001$ , and \*\*\*\*  $p <$   
973  $0.0001$ ).  
974  
975  
976

Figure S7

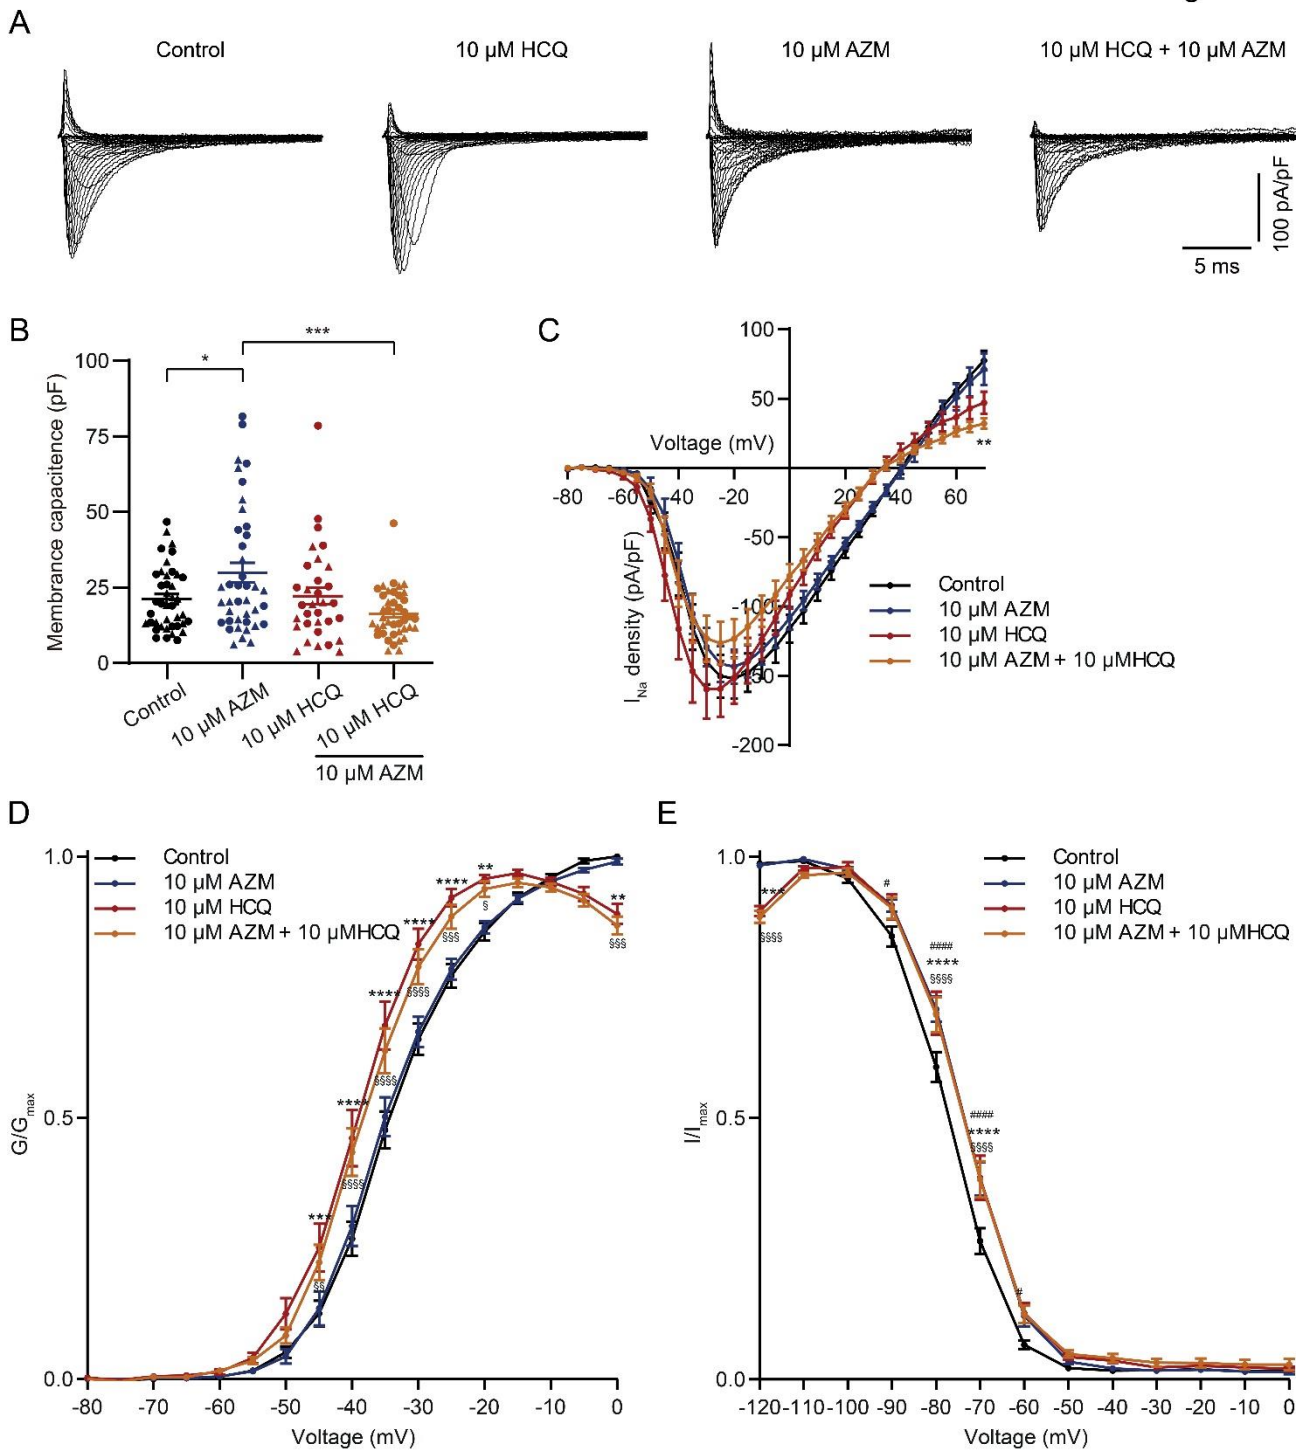

977

978 **Supplementary Figure 7: Effects of HCQ and AZM on the sodium channel.** A, Representative  
 979  $I_{Na}$  traces of iPSC-CMs in the control and drug-treated groups (10  $\mu$ M AZM, 10  $\mu$ M HCQ, and their  
 980 combination). B, Statistical analysis of membrane capacitance of iPSC-CMs in the control and  
 981 drug-treated groups. Different shapes of symbols indicate different differentiations. C, Statistical  
 982 analysis of  $I_{Na}$  in control and 7-day drug-treated groups. D, E Steady-state activation (D) and  
 983 inactivation (E) in control and 7-day drug treated groups.  $I_{Na}$  steady-state kinetics are altered by  
 984 AZM and HCQ. n=41, 40, 30, and 41 cells for the control, 10  $\mu$ M AZM-treated, 10  $\mu$ M HCQ-treated,

985 and AZM and HCQ combination groups, respectively, were analyzed; shown are mean and SEM  
 986 from 6 independent differentiations (B-E). One-way ANOVA with Tukey's multiple comparison test  
 987 (B) and two-way ANOVA with Bonferroni post-hoc test (C-E) were used for statistical analysis (\* p  
 988 < 0.05, \*\* p < 0.01, \*\*\* p < 0.001, and \*\*\*\* p < 0.001).

989

990 **Supplementary Table 1: Spontaneously beating status of iPSC-CM culture during 15 days of**  
 991 **the recording**

| Number of beating culture       | Day 0 | Day 1 | Day 2 | Day 3 | Day 4 | Day 5 | Day 6 | Day 7 | Day 8 | Day 9 | Day 10 | Day 11 | Day 12 | Day 13 | Day 14 |
|---------------------------------|-------|-------|-------|-------|-------|-------|-------|-------|-------|-------|--------|--------|--------|--------|--------|
| Basal                           | 13    | 13    | 13    | 13    | 13    | 13    | 13    | 13    | 13    | 13    | 13     | 13     | 13     | 13     | 13     |
| 1 $\mu$ M AZM                   | 10    | 10    | 10    | 10    | 10    | 10    | 10    | 10    | 10    | 10    | 10     | 10     | 10     | 10     | 10     |
| 10 $\mu$ M AZM                  | 11    | 11    | 11    | 11    | 11    | 11    | 11    | 11    | 11    | 11    | 9      | 9      | 9      | 9      | 9      |
| 1 $\mu$ M HCQ                   | 10    | 10    | 10    | 10    | 10    | 10    | 10    | 10    | 10    | 10    | 9      | 8      | 8      | 8      | 8      |
| 3 $\mu$ M HCQ                   | 10    | 10    | 10    | 10    | 10    | 10    | 10    | 10    | 10    | 10    | 10     | 10     | 9      | 9      | 8      |
| 10 $\mu$ M HCQ                  | 12    | 12    | 12    | 12    | 12    | 12    | 12    | 12    | 12    | 12    | 11     | 11     | 10     | 8      | 6      |
| 1 $\mu$ M AZM & 1 $\mu$ M HCQ   | 10    | 10    | 10    | 10    | 10    | 10    | 10    | 10    | 10    | 10    | 10     | 10     | 9      | 9      | 9      |
| 1 $\mu$ M AZM & 3 $\mu$ M HCQ   | 11    | 11    | 11    | 11    | 11    | 11    | 11    | 11    | 11    | 11    | 10     | 9      | 8      | 8      | 8      |
| 1 $\mu$ M AZM & 10 $\mu$ M HCQ  | 11    | 11    | 11    | 11    | 11    | 11    | 11    | 11    | 11    | 11    | 11     | 10     | 8      | 6      | 6      |
| 10 $\mu$ M AZM & 1 $\mu$ M HCQ  | 11    | 11    | 11    | 11    | 11    | 11    | 11    | 11    | 11    | 11    | 10     | 9      | 9      | 9      | 9      |
| 10 $\mu$ M AZM & 3 $\mu$ M HCQ  | 11    | 11    | 11    | 11    | 11    | 11    | 11    | 11    | 11    | 11    | 11     | 11     | 8      | 8      | 6      |
| 10 $\mu$ M AZM & 10 $\mu$ M HCQ | 11    | 11    | 11    | 11    | 11    | 11    | 11    | 8     | 5     | 4     | 4      | 3      | 2      | 2      | 2      |

992

993 **Supplementary Video**

994 Supplementary Video 1

995 <https://cloudstore.zih.tu-dresden.de/index.php/s/aTgmHiBpzbSLAHf>

996

997 Supplementary Video 2

998 <https://cloudstore.zih.tu-dresden.de/index.php/s/CN55aXTJPQL6f5H>

999

1000
